# Supplementary material for: Current status of postnatal depression smartphone applications available on application stores: an information quality analysis
Source: PubMed Central journal article supplement — BMJ Open. 2017 Nov 14;7(11):e015655. doi: 10.1136/bmjopen-2016-015655 (PMC5695478; doi:10.1136/bmjopen-2016-015655), 2017-11-14
Supplement: bmjopen-2016-015655.draft_revisions.pdf [file bmjopen-2016-015655.draft_revisions.pdf]

# BMJ Open

BMJ Open is committed to open peer review. As part of this commitment we make the peer review history of every article we publish publicly available.

When an article is published we post the peer reviewers' comments and the authors' responses online. We also post the versions of the paper that were used during peer review. These are the versions that the peer review comments apply to.

The versions of the paper that follow are the versions that were submitted during the peer review process. They are not the versions of record or the final published versions. They should not be cited or distributed as the published version of this manuscript.

BMJ Open is an open access journal and the full, final, typeset and author-corrected version of record of the manuscript is available on our site with no access controls, subscription charges or pay-per-view fees (<http://bmjopen.bmj.com>).

If you have any questions on BMJ Open's open peer review process please email [editorial.bmjopen@bmj.com](mailto:editorial.bmjopen@bmj.com)

# BMJ Open

## Current Status of Postnatal Depression Smartphone Applications available on Application Stores: An Information Quality Analysis

|                                    |                                                                                                                                                                                                                                                                                                                                                                                                                                                      |
|------------------------------------|------------------------------------------------------------------------------------------------------------------------------------------------------------------------------------------------------------------------------------------------------------------------------------------------------------------------------------------------------------------------------------------------------------------------------------------------------|
| Journal:                           | <i>BMJ Open</i>                                                                                                                                                                                                                                                                                                                                                                                                                                      |
| Manuscript ID                      | bmjopen-2016-015655                                                                                                                                                                                                                                                                                                                                                                                                                                  |
| Article Type:                      | Research                                                                                                                                                                                                                                                                                                                                                                                                                                             |
| Date Submitted by the Author:      | 24-Dec-2016                                                                                                                                                                                                                                                                                                                                                                                                                                          |
| Complete List of Authors:          | Zhang, Melvyn; National University of Singapore, Psychological Medicine<br>Loh, Alvona; National University Singapore Yong Loo Lin School of<br>Medicine, Psychological Medicine<br>Wing, Tracey; National Healthcare Group<br>Wynne, Olivia; University of Newcastle<br>Ho, Roger; National University of Singapore, Department of Psychological<br>Medicine<br>Chan, Sally; University of Newcastle, Australia, School of Nursing and<br>Midwifery |
| <b>Primary Subject<br>Heading</b>: | Obstetrics and gynaecology                                                                                                                                                                                                                                                                                                                                                                                                                           |
| Secondary Subject Heading:         | Mental health                                                                                                                                                                                                                                                                                                                                                                                                                                        |
| Keywords:                          | postnatal depression, Silberg scale, MHealth                                                                                                                                                                                                                                                                                                                                                                                                         |
|                                    |                                                                                                                                                                                                                                                                                                                                                                                                                                                      |

SCHOLARONE™  
Manuscripts

Only

1  
2  
3 **Current Status of Postnatal Depression Smartphone Applications available on Application Stores: An**  
4 **Information Quality Analysis**  
5

6 **Melvyn WB Zhang MBBS, DCP, MRCPsych<sup>1</sup>, Loh AZ<sup>2</sup>, Tracy Wing, MBBS<sup>3</sup>, Olivia Wynne, PHD<sup>4</sup>,**  
7 **, Roger CM Ho MBBS, MRCPsych, FRCPC<sup>2</sup> Sally WC Chan PhD, RN, FAAN<sup>4</sup>**  
8  
9

10 **Author Details:**

11 <sup>1</sup>Centre for Healthcare Innovation & Medical Engineering, Biomedical Institute for Global Health  
12 Research and Technology (BIGHEART), National University of Singapore

13 <sup>2</sup>Department of Psychological Medicine, Yong Loo Lin School of Medicine, National University of  
14 Singapore, Singapore

15 <sup>3</sup>National Healthcare Group, Singapore

16 <sup>4</sup>Faculty of Health & Medicine School of Nursing and Midwifery, University of Newcastle, New South  
17 Wales, Australia.  
18  
19

20  
21  
22  
23 Corresponding author:

24 Melvyn Zhang

25 Associate Consultant (Psychiatrist) & Adjunct Research Scientist

26 Email: melvynzhangweibin@gmail.com  
27

28 Address:

29 Centre for Healthcare Innovations & Medical Engineering

30 Biomedical Institute for Global Health Research and Technology (BIGHEART)

31 National University of Singapore

32 MD6, 14 Medical Drive

33 #14-01, Singapore 117599  
34  
35

36 Mainline: 65-63892504

37 Fax: 65-63892222

38 Total number of Figures: 1

39 Total number of Tables: 3

40 Number of words: 3914

41 Total number of References: 16  
42  
43

44 Keywords: M-Health, Smartphones, Postnatal Depression, Information Quality

45 Competing Interests: The authors declare that they have no competing interests.

46 Authors' contribution: All the authors jointly conceptualized the current research idea. MZ and RH  
47 assisted in the extraction of the data from the respective app stores. LAZ and TW helped in the  
48 preparation of the tables and the analysis of the results. MZ wrote up the initial draft of the manuscript,  
49 which was further amended and worked upon by all the authors, including that of MZ, RCMH, OW and  
50 SC. OW and SC proof-read and assisted in the preparation of the manuscript for final submission.

51 Data-sharing statement: All data used for preparation of this manuscript has been included within the  
52 manuscript.  
53  
54  
55  
56  
57  
58  
59  
60

## Abstract

### Introduction:

The World Health Organization, in its latest report has highlighted that approximately 10% of mothers suffer from depression during their pregnancy. In the recent years, technology has become an integral part of healthcare. E-health (Electronic Health) as well M-Health (Mobile Health) are increasingly being used as tools for healthcare. There remains a paucity of research studies evaluating the potential of m-health and smartphone applications for postnatal depression.

### Aims:

Given this, it is the aim of the current research to identify not only some common functionalities of postnatal application, but also to determine the quality of the information content of postnatal depression application using validated scales that have been applied for applications in other specialities.

### Methods:

In order to determine the information quality of the postnatal depression smartphone applications, the two most widely used smartphone application stores, namely that of Apple iTunes as well as Google Android Play store were searched between 1<sup>st</sup> and 30<sup>th</sup> November 2016. The Silberg scale was used in the assessment of the information quality of the smartphone applications.

### Results:

Our current results highlighted that whilst there is currently a myriad of applications, only a limited number (n=9) are specifically focused on postnatal depression. In addition, the vast majority of the currently available applications on the store have only disclosed their last date of modification as well as ownership. There remain very limited disclosures about the information of the authors, as well as the references for the information included in the application itself. The average score for the Silberg scale for the postnatal applications we have analysed is that of 3.1

### Conclusions:

There remains a need for healthcare professionals and developers to jointly conceptualize new applications with better information quality and evidence base.

### Strengths:

1. Overview of the functionalities of the vast majority of postnatal applications on the store
2. Application of validated scales in the assessment of information quality of the applications
3. Identification of shortfalls with regards to current conceptualized applications

### Limitations:

1. Only Singapore based application stores were search and hence some applications might be missing
2. Rapid conceptualization of applications would mean that new applications developed outside of the search window were not included
3. Silberg scale assess only the information quality and not the other aspects of the application.

### Introduction

The World Health Organization, in its latest report has highlighted that approximately 10% of mothers suffer from depression during their pregnancy [1]. Postnatally, the figures for depression increases to that of 13% [1]. The World Health Organization has pointed out that the prevalence of depression varies in accordance to the regions, with low and middle income developing countries having a higher prevalence of postnatal depression [1]. More importantly, the World Health Organization has highlighted that postnatal depression is associated with significant morbidity and even mortality, as some severely depressed mothers do commit suicide [1]. Clearly, with the significant associated morbidity as well as mortality, there is a clear role for interventional strategies. The World Health Organization in its report published in 2003 [2] has clearly highlighted that there is a need for an early identification as well as an effective treatment model that various countries could base on [2]. In developed countries like in Australia, it has been estimated that postnatal depression would affect every 1 in 7 women; and there are also similar depressive symptoms in new fathers [3]. Even in an Asian country like Singapore, there have been more focus on this significant psychiatric conditions and the current clinical practice guidance recommends that those who are suspected to be having such symptoms be referred to specialist care acutely [4].

Some of the core symptoms in postnatal depression includes that of low mood, marked reduction in self-esteem, loss of interest and enjoyment as well as tearfulness. Some women also report of hopeless as well as excessive fatigue [5]. In addition, it is also not uncommon for mothers to report of increased anxiety with regards to their baby's well-being [5]. Such anxiety symptoms might in turn result in a diminished affection for their baby as well as breastfeeding related difficulties [5]. It is essential for postnatal depression to be screened for and detected early, given that untreated postnatal depression does have consequential effects not only for mothers themselves, but also for their newborn. Clearly, postnatal depression could increase the risk of new mothers harming themselves or their children if they are severely depressed, or if they have had symptoms of psychotic depression. For the newborn, there have been recent studies that have highlighted how the postpartum bonding could be adversely affected due to the presence of depressive symptoms in a new mother [6]. The poor postpartum bonding could also result in consequential attachment issues in the newborn, that could be carried into adulthood [6]. In particular, these newborns tend to have insecure attachment to their parental figures. Aside from attachment related issues, children born of mothers with underlying postnatal depression do commonly have resultant cognitive issues as well as language and expressive issues. From a public policy perspective, postnatal depression and its associated morbidity and mortality would lead to a tremendous burden in healthcare. Studies have been conducted in the United Kingdom, which have

1  
2  
3 shown that postnatal depression has on the average led to a massive reduction not only in earnings, but  
4 also a reduction in the health-related quality of life [7]. Hence, there is thus a need for early  
5 identification and various interventions for treatment. Based on the recommendations of the National  
6 Institute for Clinical Excellence (NICE) guidelines, there are different approaches to deal with the issue of  
7 postnatal depression and the main determinant for this would be that of the severity of the depressive  
8 symptoms. Based on the stepped care recommendations of the NICE guidelines, women with sub-  
9 threshold levels of depression could receive self-help programs [8]. However, psychological based  
10 treatment, such as that of cognitive behavioral therapy, along with medications would be recommended  
11 for mothers diagnosed with mild to moderately severe postnatal depression [8]. Medications that are  
12 indicated for the treatment of postnatal depression include that of the tricyclic antidepressants as well  
13 as the selective serotonin reuptake inhibitors [8]. For mothers with severe depression, who are clearly at  
14 risk to either themselves or to their baby, inpatient admission and treatment would be recommended  
15 and would be warranted.  
16  
17  
18  
19

20 In the recent years, technology has become an integral part of healthcare. E-health (Electronic Health)  
21 as well M-Health (Mobile Health) are increasingly being used as tools for healthcare. There have been  
22 recent studies that has highlighted that new mothers and those who are suffering from postnatal  
23 depression are interested in the utilization of a health application [9]. These findings are of significance,  
24 as it would mean that new mothers are not averse to the usage of technology in helping them manage  
25 their mood related symptoms and conditions. Clearly, one of the major challenges faced by all new  
26 mothers is that of time management, and setting time aside for a medical consultation might be  
27 difficult. In addition, in some countries like that of Australia and Canada, there might be geographical  
28 barriers that prevent these new mothers from seeking the appropriate help. To date, there has been  
29 quite a number of trials evaluating the potential primarily of E-Health in supporting new mothers with  
30 postnatal depression. Lee et al. (2016) [10] recently conducted a systematic review and have highlighted  
31 that E-health is indeed a feasible option and also a cost-effective solution. However, there remains a  
32 paucity of research studies evaluating the potential of m-health and smartphone applications for  
33 postnatal depression. Most of the published research to date have highlighted how these tools are  
34 useful for healthcare workers in the low and middle income countries, and the existing tools only  
35 provide basic psycho-educational information [11].  
36  
37  
38  
39

40 Zhang et al. (2015) [12] have previously highlighted the importance of healthcare professionals'  
41 involvement in the conceptualization of smartphone based interventions. More importantly, Zhang et al.  
42 (2015) [12] have also highlighted the need for current applications to be further evaluated in terms of  
43 their informational contents using validated scales. Such an analysis is critical, given that there is a  
44 myriad of other post-natal applications on the application stores. In addition, prior research done on  
45 obesity applications [13] as well as cardiovascular applications [14] have highlighted that there are  
46 several shortcomings inherent in the applications currently available on the app store.  
47  
48  
49

50 **Given this, it is the aim of the current research to identify not only some common functionalities of**  
51 **postnatal application, but also to determine the quality of the information content of postnatal**  
52 **depression application using validated scales that have been applied for applications in other**  
53 **specialities.**  
54

## 55 **Methodology**

### 56 **Selection of Smartphone Applications**

57  
58  
59  
60

In order to determine the information quality of the postnatal depression smartphone applications, the two most widely used smartphone application stores, namely that of Apple iTunes as well as Google Android Play store were searched between 1<sup>st</sup> and 30<sup>th</sup> November 2016. The following keywords were utilized in the search strategy, that of “postnatal” and “depression.” The search yielded a cumulative total of 67 applications, with 7 from the Apple iTunes store and 60 from the Google Android Play store. After reviewing the description of the applications, a cumulative total of 58 applications were excluded as they were of no relevance (not an application targeted for postnatal depressive disorder or not in English language). In the event that both a free and a paid version were available on the store, only the freely available version was downloaded for further evaluation. Any duplicated smartphone applications were removed. In addition, only English language version of smartphone applications were downloaded and considered in the current review. Each of the respective application were downloaded on either an Apple iPhone 6s device (for the Apple Platform running IOS operating system 10.1) or on a Xiaomi Note 3 (For the Android Platform running Android Marshmallow operating system). At the end, a total of 9 applications were included for the evaluation of their underlying information quality. Figure 1 illustrates the selection process for the smartphone applications.

----- Insert Figure 1-----

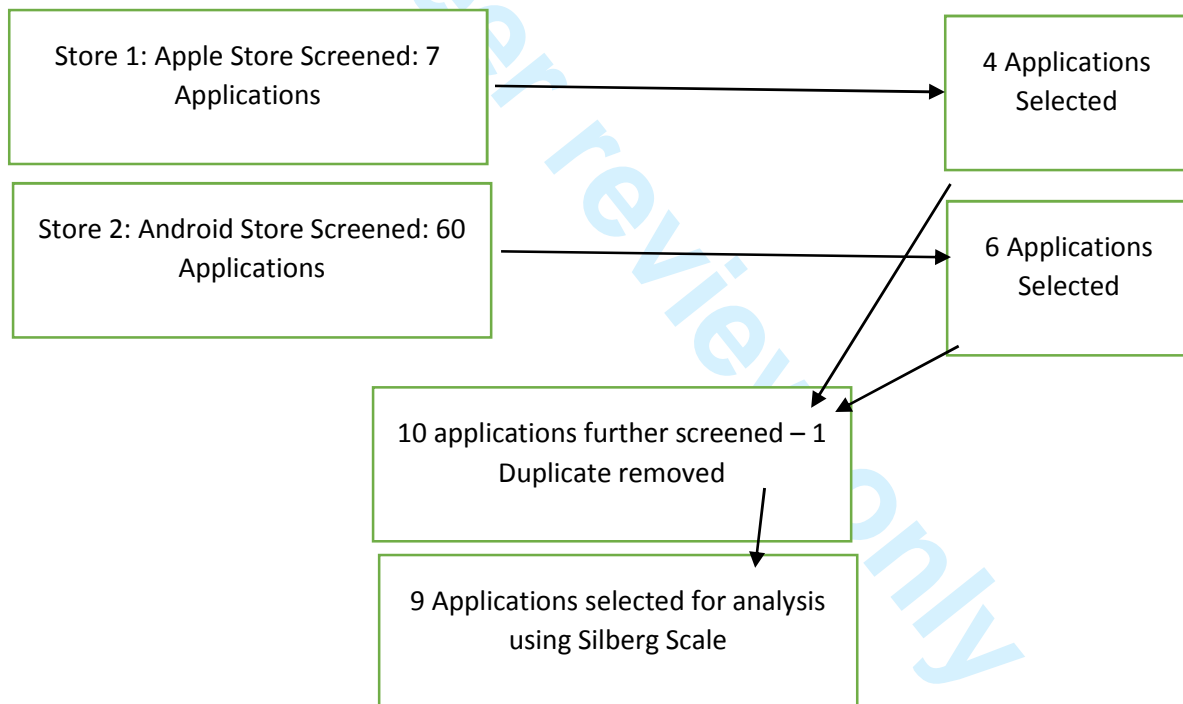

Figure 1: Flow chart showing the selection process of smartphone applications related to postnatal care

### Analysis of the Information Quality of Smartphone Applications

To date, there remains no standardized scale that has been recommended by any guidelines for the assessment of application quality as well as for the analysis of the information quality of smartphone applications. Hence, the authors have decided to make use of the 9-points Silberg scale [15], which was initially developed by Griffiths and Christensen (2002) [15] and have been extensively to determine the quality of information furnished via online websites [15] as well as the quality of information inherent in

smartphone applications [14]. Notably, the same scale has been recently utilized by researchers in the analysis of the information quality of bariatric applications as well as cardiovascular applications [13,14]. The Silberg scale takes into consideration the following domains, as illustrated in Table 1. The total cumulative score possible is that of 9 points and a higher score is indicative of better information quality.

----- Insert Table 1 -----

| Categories for assessment of information quality | Individual sub-scale items                                                                                                               |
|--------------------------------------------------|------------------------------------------------------------------------------------------------------------------------------------------|
| Authorship                                       | a. Whether authors are identified<br>b. Whether affiliations of author are identified<br>c. Whether credentials of authors are furnished |
| Attribution of information sources               | a. Whether sources are given<br>b. Whether references are given or hyperlinked in text                                                   |
| Disclosure                                       | a. Whether application ownership disclosed<br>b. Whether application sponsorship disclosed                                               |
| Currency                                         | a. Whether application has been modified in the past month<br>b. Whether application has included a last modification date               |
| <b>Cumulative total score</b>                    | <b>9 points</b>                                                                                                                          |

Table 1: Categories for assessment of information quality based on the Silberg Scale

### Methodology of scoring and assessment

The first author MWBZ and the last author RCMH were involved in the extraction of the relevant information and the initial analysis and scoring of each of the respective applications. If there were any disagreements amongst the authors, it was resolved with discussion.

### Data analysis

The data collated were analyzed using descriptive statistics. The frequency, mean and standard deviation were computed based on the scores acquired from the Silberg scale.

### Results

#### Core Characteristic of Postnatal Depression Applications

A cumulative total of 9 applications were included for analysis. Table 2 provides an overview of the applications which were identified and further analysed. Table 2 also summarizes the core characteristics of the applications.

----- Insert Table 2 -----

| Name of Application         | Platform | General Description                                                                          |
|-----------------------------|----------|----------------------------------------------------------------------------------------------|
| Postnatal Yoga              | Android  | Yoga exercises for postnatal mothers who are suffering from postnatal anxiety or depression. |
| Baby Care Week by Week Tips | Android  | Educational information, audio and videos about postnatal depression                         |



|                              |                 |                                                                                                                           |
|------------------------------|-----------------|---------------------------------------------------------------------------------------------------------------------------|
| PPD Gone!                    | Android         | Educational information (Week by Week) about how best to manage newborn along with information about postnatal depression |
| Self Help                    | Android         | Leaflets about Postnatal Depression / Educational Information                                                             |
| Anxiety and Depression Scale | Android         | Includes various rating scales / Includes the Edinburgh postnatal depression scale to evaluate for depressive symptoms    |
| New Baby, New Life           | Android / Apple | Podcast focusing on hypnosis for management of postnatal depression symptoms                                              |
| What were we thinking!       | Apple           | Educational Information with videos and journaling function for postnatal depression                                      |
| PPD Screening                | Apple           | Includes the Edinburgh Postnatal depression scale to evaluate for depressive symptoms                                     |
| Essential Baby Care Guide    | Apple           | Educational information covering topic such as feeding, sleeping, care and development and first aid skills               |

Table 2: Core Functionalities of postnatal depression application that are included in the current analysis

### Information Quality Analysis

For the 9 applications, the average Silberg score was that of 3.33 with a standard deviation of 1.80, out of a total score of 9 points. Only three out of the total of 10 applications have a score greater than or equal to the mean score of 3.1. Most of the applications have disclosed the date of last modification (100.0%), as well as disclosed the ownership of the applications (88.9%). Some of the applications have identified the authors (33.3%), as well as provided the necessary references (33.3%). The current gaps in the information quality pertains to the currency of the application (whether there have been any modifications in the past month), as well as the disclosure of the affiliations and credentials of the authors. In addition, most of the applications have not also provided references for the information which they have included and have not disclosed their competing interests. Table 3 provides a summary of the mean scores for each of the individual categories.

Table 3 summarizes the mean score for each of category of the criteria in the Silberg scale.

| Category                               | Mean Scores | Standard Deviation |
|----------------------------------------|-------------|--------------------|
| Authorship – Identification of Authors | 0.33        | 0.50               |
| Authorship – affiliations of Authors   | 0.22        | 0.44               |
| Authorship – credentials of Authors    | 0.22        | 0.44               |
| Attribution – Sources                  | 0.22        | 0.44               |
| Attribution – Provision of reference   | 0.33        | 0.50               |
| Disclosure – Ownership of applications | 0.83        | 0.33               |
| Disclosure – Competing interest        | 0.11        | 0.33               |

|                                                    |      |   |
|----------------------------------------------------|------|---|
| Currency – Modification within the past month      | 0    | 0 |
| Currency – Disclosure of date of last modification | 1.00 | 0 |

## Discussion

This is perhaps one of the first study that has been conducted to date that looks into the information quality of postnatal depression smartphone applications. To date, there has only been systematic reviews about E-Health innovations for postnatal depression. There remains a lack of analysis about the information quality of smartphone based postnatal depression applications. Our current results highlighted that whilst there is currently a myriad of applications, only a limited number (n=9) are specifically focused on postnatal depression. In addition, the vast majority of the currently available applications on the store have only disclosed their last date of modification as well as ownership. There remain very limited disclosures about the information of the authors, as well as the references for the information included in the application itself. The average score for the Silberg scale for the postnatal applications we have analysed is that of 3.1 This score is significantly inferior as compared to other analysis which have used the same scale for the computation of the information of bariatric [13] as well as cardiovascular applications [14].

Based on the current review, it is obvious that most of the applications are lacking in several aspects and hence the resultant low scores on the Silberg scale. It is of importance that smartphone applications not only contain appropriate information, but smartphone applications do need to have appropriate references as well as cite the authors responsible for the creation of the informational contents. This is especially important for postnatal related applications, as these applications do frequent provide information not only for the new mothers, but also information relating to the care of their newborn babies. As mentioned previously, the scores we have obtained are largely similar to that of bariatric [13] and cardiovascular applications that have been previously reviewed [14]. Zhang et al. [12] have previously proposed and highlighted the importance of having healthcare professionals in the joint conceptualization of smartphone applications, as well as having a governmental regulatory body to help in the assessment of applications which are deemed safe and reliable for the general public to utilize. From our knowledge, the Royal College of Psychiatrists is one of the organization that has provided the general public with mental health leaflets (both in print and online version) that is carefully curated in terms of information quality. The College have been successful in doing so, by ensuring that there is a group of experts to draft as well as to provide periodic timely updates to the mental health leaflets, to ensure that the information is kept current, as well as accurate. This strategy is perhaps how the college has been granted the United Kingdom's information safety standards for the information they have included in their leaflets for dissemination to the general public.

Zhang et al. [13] in their previous analysis of the information quality of bariatric related applications have highlighted several reasons for the lack of provision of references for the information sources. The authors previously pointed out how variations in screen size might results in technical difficulties with the integration of reference sources. However, with the recent advances in smartphone application development, especially with the usage of cross-platform programming techniques, this issue could potentially be overcome, as the newer programming techniques would ensure the compatibility of the

1  
2  
3 application across a myriad of varying devices as well as screen sizes. In addition, one of the reasons as  
4 to why most of the applications have not been updated recently nor indicated a date of last update has  
5 to do much with the way the applications have been developed. Most of the current conceptualizations  
6 relies heavily on coding informational content within the application, and hence updating the contents  
7 within the application would be an issue. In the conceptualization of further applications, it would be  
8 recommended for application developers and healthcare professionals to jointly consider the  
9 integration of a dynamic content management system, such that the information contents within the  
10 application could be updated in real-time and kept current.  
11  
12

13  
14 One of the major strengths of the current study is that we managed to make use of a validated scale  
15 evaluate the information quality of postnatal depression applications that are currently available on the  
16 app stores. The usage of the scale has enabled us to determine the limitations in the information  
17 quality. In addition, as the same scale has also been utilized in the evaluation of other applications from  
18 other disciplines, we are able to compare and elucidate the common issues underlying the gaps in  
19 information quality across a spectrum of applications. The findings would be of relevance to regulatory  
20 bodies who are planning for policies involving smartphone applications. Despite the aforementioned  
21 strengths, there are several limitations of the current study. In our current study, the applications are  
22 identified via either the Apple or the Android application stores. Whilst these are the two most common  
23 application stores, there might be very different applications available on the other platforms which we  
24 have not evaluated. In addition, we have limited the search strategy to applications that are  
25 downloaded only in Singapore. Whilst the authors have extracted the applications from the store over a  
26 duration of one month, with the rapid development of smartphone applications using new technologies  
27 of cross-platform programming, it is not unexpected that new applications deployed onto the store after  
28 the period of evaluation are not considered. In addition, the authors have made use of the keywords  
29 "Postnatal" and "Depression" to conduct a search of the applications. The search terminologies might  
30 not be comprehensive enough to capture all the postnatal applications available on the store. The  
31 Silberg scale might have well been validated across several studies for the evaluation of the information  
32 quality, but it is not specific for information quality for smartphone applications and does not cover and  
33 assess for other aspects of the smartphone application, such as usability and levels of engagement.  
34 More recently, researchers have proposed the utilization of the Mobile Application Rating Scale [16] for  
35 the evaluation of smartphone applications. Whilst the Mobile Application Rating Scale appears to be  
36 comprehensive, one of the concerns the authors have is that there are only 4 questions looking into the  
37 information quality, which asked about only the quality, quantity, visual presentation and credulity of  
38 sources.  
39  
40  
41  
42  
43  
44

## 45 **Conclusions**

46  
47 Postnatal depression is highly prevalent and is associated with multiple comorbidities as well as possible  
48 mortality. E-health interventions have been demonstrated to be efficacious and there are M-health  
49 interventions deployed in low and middle income countries, that has been evaluated by research.  
50 However, there remains a myriad of postnatal applications on the application store. It is pertinent for us  
51 to determine not only the contents within these applications, as well as apply validated scales to assess  
52 their information quality. Similar to bariatric and cardiovascular applications, there remains paucity of  
53 disclosures in various domains. Further conceptualizations and research on postnatal M-health  
54 interventions should target these areas identified in the current review.  
55  
56  
57  
58  
59  
60

**Acknowledge:**

The current study has received no funding support.

**Disclosure statement:**

The authors declare that they have no competing interests.

**References:**

1. Maternal Mental Health. World Health Organization. Extracted from [http://www.who.int/mental\\_health/maternal-child/maternal\\_mental\\_health/en/](http://www.who.int/mental_health/maternal-child/maternal_mental_health/en/), last assessed on 1<sup>st</sup> December 2016.
2. Postpartum depression: Literature review of risk factors and interventions. World Health Organization. Extracted from [http://www.who.int/mental\\_health/prevention/suicide/lit\\_review\\_postpartum\\_depression.pdf](http://www.who.int/mental_health/prevention/suicide/lit_review_postpartum_depression.pdf), last assessed on 1<sup>st</sup> December 2016.
3. Perinatal Anxiety and Depression Australia (2012). Extracted from <http://www.panda.org.au/news/412-research-reveals-the-alarming-economic-cost-of-postnatal-depression->, last assessed on the 28<sup>th</sup> November 2016.
4. Depression: Clinical Practice Guidelines. Ministry of Health, Singapore. Extracted from [https://www.moh.gov.sg/content/dam/moh\\_web/HPP/Doctors/cpg\\_medical/current/2012/depression/Depression%20CPG\\_R14\\_FINAL.pdf](https://www.moh.gov.sg/content/dam/moh_web/HPP/Doctors/cpg_medical/current/2012/depression/Depression%20CPG_R14_FINAL.pdf), last assessed on 1<sup>st</sup> December 2016.
5. B.K. Puri, A. Hall and R. Ho (2014). Revision Notes in Psychiatry. London, UK: CRC Press, pp. 564-566
6. Nonnenmacher N, Noe D, Ehrental JC, Reck C. Postpartum bonding: the impact of maternal depression and adult attachment style. Arch Womens Ment Health. 2016 Oct;19(5):927-35. doi: 10.1007/s00737-016-0648-y.
7. Bauer A, Pawlby S, Plant DT, King D, Pariante CM, Knapp M. Perinatal depression and child development: exploring the economic consequences from a South London cohort. Psychol Med. 2015 Jan;45(1):51-61. doi: 10.1017/S0033291714001044.
8. Postnatal depression guideline. National Institute for Clinical Excellence. Extracted from <https://www.nice.org.uk/guidance/cg192/chapter/1-Recommendations>, last assessed on 22<sup>nd</sup> November 2016
9. Osmá J, Barrera AZ, Ramphos E. Are Pregnant and Postpartum Women Interested in Health-Related Apps? Implications for the Prevention of Perinatal Depression. Cyberpsychol Behav Soc Netw. 2016 Jun;19(6):412-5. doi: 10.1089/cyber.2015.0549.
10. Lee EW, Denison FC, Hor K, Reynolds RM. Web-based interventions for prevention and treatment of perinatal mood disorders: a systematic review. BMC Pregnancy Childbirth. 2016 Feb 29;16:38. doi: 10.1186/s12884-016-0831-1.
11. Amoakoh-Coleman M, Borgstein AB, Sondaal SF, Grobbee DE, Miltenburg AS, Verwijs M, Ansa EK, Browne JL, Klipstein-Grobusch K. Effectiveness of mHealth Interventions Targeting Health

- 1  
2  
3 Care Workers to Improve Pregnancy Outcomes in Low- and Middle-Income Countries: A  
4 Systematic Review. *J Med Internet Res*. 2016 Aug 19;18(8):e226. doi: 10.2196/jmir.5533.  
5  
6 12. Zhang MW, Ho RC, Cheek CCS. Technological Innovations in mental healthcare: Harnessing the  
7 digital revolution. *Br J Psychiatry* 2-15;206:263-265.  
8  
9 13. Zhang MW, Ho RC, Hawa R, Sockalingam S. Analysis of the Information Quality of Bariatric  
10 Surgery Smartphone Applications Using the Silberg Scale. *Obes Surg*. 2016 Jan;26(1):163-8. doi:  
11 10.1007/s11695-015-1890-5. Review.  
12  
13 14. Xiao Q, Lu S, Wang Y, Sun L, Wu Y. Current Status of Cardiovascular Disease-Related Smartphone  
14 Apps Downloadable in China. *Telemed J E Health*. 2016 Jun 29. [Epub ahead of print]  
15  
16 15. Griffiths KM, Christensen H. Quality of Web-based information on the treatment of depression:  
17 a cross-section survey. *BMJ*. 2000;321(7275):1511-5.  
18  
19 16. Domnich A, Arata L, Amicizia D, Signori A, Patrick B, Stoyanov S, Hides L, Gasparini R, Panatto D.  
20 Development and validation of the Italian version of the Mobile Application Rating Scale and its  
21 generalisability to apps targeting primary prevention.  
22 *BMC Med Inform Decis Mak*. 2016 Jul 7;16:83. doi: 10.1186/s12911-016-0323-2.  
23  
24  
25  
26  
27  
28  
29  
30  
31  
32  
33  
34  
35  
36  
37  
38  
39  
40  
41  
42  
43  
44  
45  
46  
47  
48  
49  
50  
51  
52  
53  
54  
55  
56  
57  
58  
59  
60

# BMJ Open

## Current Status of Postnatal Depression Smartphone Applications available on Application Stores: An Information Quality Analysis

|                                 |                                                                                                                                                                                                                                                                                                                                                                                                                                                                                                                                                                                                                                                                                                                                                                                 |
|---------------------------------|---------------------------------------------------------------------------------------------------------------------------------------------------------------------------------------------------------------------------------------------------------------------------------------------------------------------------------------------------------------------------------------------------------------------------------------------------------------------------------------------------------------------------------------------------------------------------------------------------------------------------------------------------------------------------------------------------------------------------------------------------------------------------------|
| Journal:                        | <i>BMJ Open</i>                                                                                                                                                                                                                                                                                                                                                                                                                                                                                                                                                                                                                                                                                                                                                                 |
| Manuscript ID                   | bmjopen-2016-015655.R1                                                                                                                                                                                                                                                                                                                                                                                                                                                                                                                                                                                                                                                                                                                                                          |
| Article Type:                   | Research                                                                                                                                                                                                                                                                                                                                                                                                                                                                                                                                                                                                                                                                                                                                                                        |
| Date Submitted by the Author:   | 05-Jul-2017                                                                                                                                                                                                                                                                                                                                                                                                                                                                                                                                                                                                                                                                                                                                                                     |
| Complete List of Authors:       | Zhang, Melvyn; National University of Singapore, Psychological Medicine<br>Ho, Roger; National University of Singapore, Department of Psychological Medicine<br>Loh, Alvona; National University Singapore Yong Loo Lin School of Medicine, Psychological Medicine<br>Wing, Tracey; National Healthcare Group<br>Wynne, Olivia; University of Newcastle<br>Chan, Sally; University of Newcastle, Australia, School of Nursing and Midwifery<br>Fung, Daniel Shuen Sheng; Institute of Mental Health, Research Division<br>Car, Josip; Nanyang Technological University, Health Services and Outcomes Research Programme, Lee Kong Chian School of Medicine; Imperial College London, Global eHealth Unit, Department of Primary Care and Public Health, School of Public Health |
| <b>Primary Subject Heading</b>: | Obstetrics and gynaecology                                                                                                                                                                                                                                                                                                                                                                                                                                                                                                                                                                                                                                                                                                                                                      |
| Secondary Subject Heading:      | Mental health                                                                                                                                                                                                                                                                                                                                                                                                                                                                                                                                                                                                                                                                                                                                                                   |
| Keywords:                       | postnatal depression, Silberg scale, MHealth                                                                                                                                                                                                                                                                                                                                                                                                                                                                                                                                                                                                                                                                                                                                    |
|                                 |                                                                                                                                                                                                                                                                                                                                                                                                                                                                                                                                                                                                                                                                                                                                                                                 |

SCHOLARONE™  
Manuscripts

1  
2  
3 **Current Status of Postnatal Depression Smartphone Applications available on Application Stores: An**  
4 **Information Quality Analysis**  
5

6 **Melvyn WB Zhang** *MBBS, DCP, MRCPsych*<sup>1</sup>, **Roger CM Ho** *MBBS, MRCPsych*<sup>2</sup>, *FRCPC*, **Loh**  
7 **AZ**<sup>2</sup>, **Tracey Wing**, *MBBS*<sup>3</sup>, **Olivia Wynne, PhD**<sup>4</sup>, **Sally WC Chan** *PhD, RN, FAAN*<sup>4</sup>, **Daniel SS**  
8 **Fung** *MBBS, MMed(Psychiatry), FAMS*<sup>5</sup> **Josip Car** *PhD*<sup>6</sup>  
9  
10

11  
12  
13  
14 **Author Details:**  
15

16 <sup>1</sup>National Addictions Management Service, Institute of Mental Health, Singapore

17 <sup>2</sup>Department of Psychological Medicine, Yong Loo Lin School of Medicine, National University of  
18 Singapore, Singapore

19 <sup>3</sup>National Psychiatry Residency Program, National Healthcare Group, Singapore

20 <sup>4</sup>Faculty of Health & Medicine School of Nursing and Midwifery, University of Newcastle, New South  
21 Wales, Australia.

22 <sup>5</sup>Institute of Mental Health, Singapore

23 <sup>6</sup>Nanyang Technological University, Singapore  
24  
25  
26  
27  
28  
29  
30

31 Corresponding author:

32 Melvyn Zhang

33 Associate Consultant (Psychiatrist)

34 Email: melvynzhangweibin@gmail.com  
35  
36

37 Address:

38 10 Buangkok Green Medical Park

39 Institute of Mental Health Singapore

40 Singapore 539747  
41

42 Mainline: 65-63892504

43 Fax: 65-63892222

44 Total number of Figures: 1

45 Total number of Tables: 3

46 Number of words: 3914

47 Total number of References: 16  
48  
49

50 Keywords: M-Health, Smartphones, Postnatal Depression, Information Quality

51 Competing Interests: The authors declare that they have no competing interests.

52 Authors' contribution: All the authors jointly conceptualized the current research idea.  
53  
54

55 MZ, IAZ and TW helped in the extraction of the data from the respective application stores. MZ wrote up  
56 the initial draft of the manuscript, which was further amended and worked upon by all the authors (MZ,  
57  
58  
59  
60

1  
2  
3 RCMH, SC, LAZ, TW, OW). DF and JC assisted in the 2<sup>nd</sup> revision of the manuscript. All authors have  
4 proof-read the manuscript prior to submission.

5 Data-sharing statement: All data used for preparation of this manuscript has been included within the  
6 manuscript.  
7

## 8 9 **Abstract**

### 10 **Objectives**

11  
12 It is the aim of the current research to identify not only some common functionalities of postnatal  
13 application, but also to determine the quality of the information content of postnatal depression  
14 application using validated scales that have been applied for applications in other specialities.  
15  
16

### 17 **Settings and Participants:**

18  
19 In order to determine the information quality of the postnatal depression smartphone applications, the  
20 two most widely used smartphone application stores, namely that of Apple iTunes as well as Google  
21 Android Play store were searched between 20<sup>th</sup> through to 31<sup>st</sup> May. No participants were involved. The  
22 inclusion criteria for the application was that it must have been searchable using the keywords  
23 “postnatal”, “pregnancy”, “perinatal”, “postpartum” and “depression” and must be in English language.  
24  
25

### 26 **Intervention:**

27  
28 The Silberg scale was used in the assessment of the information quality of the smartphone applications.  
29

### 30 **Primary and Secondary Outcomes Measure:**

31  
32 The information quality score was the primary outcome measure.  
33

### 34 **Results:**

35  
36 Our current results highlighted that whilst there is currently a myriad of applications, only a limited  
37 number (n=14) are specifically focused on postnatal depression. In addition, the vast majority of the  
38 currently available applications on the store have only disclosed their last date of modification as well as  
39 ownership. There remain very limited disclosures about the information of the authors, as well as the  
40 references for the information included in the application itself. The average score for the Silberg scale  
41 for the postnatal applications we have analysed is that of 3.0.  
42  
43

### 44 **Conclusions:**

45  
46 There remains a need for healthcare professionals and developers to jointly conceptualize new  
47 applications with better information quality and evidence base.  
48

### 49 **Trial registration:**

50  
51 Not applicable, as this is a systematic review  
52  
53  
54  
55  
56  
57  
58  
59  
60



**Strengths:**

1. We have managed to evaluate the information quality of postnatal applications from the 2 most popular application stores using a validated information quality scale.
2. We managed to identify the most common features found in postnatal applications available on the store.
3. We have demonstrated that the overall information quality scores is intermediate between that of bariatric and cardiovascular applications.
4. Our study findings are replicable, in that similar assessment could be conducted for applications in other specialities.
5. We have identified several gaps in information quality, which clinicians and researchers need to be cognizant of.

**Limitations:**

1. We have not been able to evaluate non-English language applications.
2. The applications available on the app store are rapidly changing in numbers and content; our current analysis is based on a cross-sectional analysis.
3. We have not evaluated the applications for their levels of engagement and aesthetics.

**Introduction**

The World Health Organization (WHO), in its latest report has highlighted that approximately 10% of mothers suffer from depression during their pregnancy [1]. Postnatally, the figures for depression increases to that of 13% [1]. The World Health Organization has pointed out that the prevalence of depression varies in accordance to the regions, with low and middle income developing countries having a higher prevalence of postnatal depression (PND) [1]. Some of the core symptoms in PND includes that of low mood, marked reduction in self-esteem, loss of interest and enjoyment as well as tearfulness. Some women also report of hopeless as well as excessive fatigue [5]. In addition, it is also not uncommon for mothers to report of increased anxiety with regards to their baby's well-being [5]. Such anxiety symptoms might in turn result in a diminished affection for their baby as well as breastfeeding related difficulties [5]. It is essential for PND to be screened for and detected early, given that untreated PND does have consequential effects not only for mothers themselves, but also for their newborn. Clearly, PND could increase the risk of new mothers harming themselves or their children if they are severely depressed, or if they have had symptoms of psychotic depression. For the newborn, there have been recent studies that have highlighted how the postpartum bonding could be adversely affected due to the presence of depressive symptoms in a new mother [6]. The poor postpartum bonding could also result in consequential attachment issues in the newborn, that could be carried into adulthood [6]. In particular, newborns tend to have insecure attachment to their parental figures. Aside from attachment related issues, children born of mothers with underlying postnatal depression do commonly have resultant cognitive issues [7] as well as language and expressive issues. Other longitudinal studies conducted have demonstrated that PND have a consequential impact on the well-being of children [8].

From a public policy perspective, postnatal depression and its associated morbidity and mortality would lead to a tremendous burden in healthcare. Studies have been conducted in the United Kingdom, which

1  
2  
3 have shown that postnatal depression has on the average led to a massive reduction not only in  
4 earnings, but also a reduction in the health-related quality of life [9]. Hence, there is thus a need for  
5 early identification and various interventions for treatment. Based on the recommendations of the  
6 National Institute for Clinical Excellence (NICE) guidelines, there are different approaches to deal with  
7 the issue of postnatal depression and the main determinant for this would be that of the severity of the  
8 depressive symptoms. Based on the stepped care recommendations of the NICE guidelines, women with  
9 sub-threshold levels of depression could receive self-help programs [10]. However, psychological based  
10 treatment, such as that of cognitive behavioral therapy, along with medications would be recommended  
11 for mothers diagnosed with mild to moderately severe postnatal depression [10]. Medications that are  
12 indicated for the treatment of postnatal depression include that of the tricyclic antidepressants as well  
13 as the selective serotonin reuptake inhibitors [10]. For mothers with severe depression, who are clearly  
14 at risk to either themselves or to their baby, inpatient admission and treatment would be recommended  
15 and would be warranted.  
16  
17  
18  
19

20 In the recent years, technology has become an integral part of healthcare. E-health (Electronic Health)  
21 as well M-Health (Mobile Health) are increasingly being used as tools for healthcare. There have been  
22 recent studies that has highlighted that new mothers and those who are suffering from postnatal  
23 depression are interested in the utilization of a health application [11]. These findings are of significance,  
24 as it would mean that new mothers are not averse to the usage of technology in helping them manage  
25 their mood related symptoms and conditions. Clearly, one of the major challenges faced by all new  
26 mothers is that of time management, and setting time aside for a medical consultation might be  
27 difficult. In addition, in some countries like that of Australia and Canada, there might be geographical  
28 barriers that prevent these new mothers from seeking the appropriate help. To date, there has been  
29 quite a number of trials evaluating the potential primarily of E-Health in supporting new mothers with  
30 postnatal depression. Lee et al. (2016) [12] recently conducted a systematic review and have highlighted  
31 that E-health is indeed a feasible option and also a cost-effective solution. However, there remains a  
32 paucity of research studies evaluating the potential of m-health and smartphone applications for  
33 postnatal depression. Most of the published research to date have highlighted how these tools are  
34 useful for healthcare workers in the low and middle income countries, and the existing tools only  
35 provide basic psycho-educational information [13].  
36  
37  
38  
39

40 Zhang et al. (2015) [14] have previously highlighted the importance of healthcare professionals'  
41 involvement in the conceptualization of smartphone based interventions. More importantly, Zhang et al.  
42 (2015) [14] have also highlighted the need for current applications to be further evaluated in terms of  
43 their informational contents using validated scales. Such an analysis is critical, given that there is a  
44 myriad of other post-natal applications on the application stores. In addition, prior research done on  
45 obesity applications [15] as well as cardiovascular applications [16] have highlighted that there are  
46 several shortcomings inherent in the applications currently available on the app store.  
47  
48  
49

50 Given this, it is the aim of the current research to identify not only some common functionalities of  
51 postnatal application, but also to determine the quality of the information content of postnatal  
52 depression application using validated scales that have been applied for applications in other  
53 specialities.  
54

## 55 **Methodology**

### 56 **Selection of Smartphone Applications**

In order to determine the information quality of the postnatal depression smartphone applications, the two most widely used smartphone application stores, namely that of Apple iTunes as well as Google Android Play store were searched between 20<sup>th</sup> through to 31<sup>st</sup> May 2017.

The following keywords were utilized in the search strategy, that of “postnatal”, “pregnancy”, “perinatal”, ‘postpartum” and “depression.” The search yielded a cumulative total of 59 applications, with 52 applications from the Google Android store and 7 applications from the Apple iTunes store. 18 applications were excluded from the Android store as they were not in English language. After reviewing the description of the applications, a cumulative total of 22 applications were excluded as they were of no relevance. The details for the exclusion of these applications are included in Figure 1. In the event that both a free and a paid version were available on the store, both versions were downloaded for further evaluation. Any duplicated smartphone applications were removed. In the event that a duplicated version of an application was offered on both platform, only version (that on the android platform) would be downloaded for further evaluation.

Each of the respective application were downloaded on either an Apple iPhone 6s device (for the Apple Platform running IOS operating system 10.1) or on a Xiaomi Note 3 (For the Android Platform running Android Marshmallow operating system). At the end, a total of 15 applications were included for the evaluation of their underlying information quality. Figure 1 illustrates the selection process for the smartphone applications. The selection process of the applications is based on the PRIMSA guidelines [17].

----- Insert Figure 1 -----

### Analysis of the Information Quality of Smartphone Applications

To date, there remains no standardized scale that has been recommended by any guidelines for the assessment of application quality as well as for the analysis of the information quality of smartphone applications. Hence, the authors have decided to make use of the 9-points Silberg scale [18], which was initially developed by Griffiths and Christensen (2002) [18] and have been extensively to determine the quality of information furnished via online websites [18] as well as the quality of information inherent in smartphone applications [14]. Notably, the same scale has been recently utilized by researchers in the analysis of the information quality of bariatric applications as well as cardiovascular applications [15,16]. The Silberg scale takes into consideration the following domains, as illustrated in Table 1. The total cumulative score possible is that of 9 points and a higher score is indicative of better information quality.

----- Insert Table 1 -----

| Categories for assessment of information quality | Individual sub-scale items                                                                                                               |
|--------------------------------------------------|------------------------------------------------------------------------------------------------------------------------------------------|
| Authorship                                       | a. Whether authors are identified<br>b. Whether affiliations of author are identified<br>c. Whether credentials of authors are furnished |
| Attribution of information sources               | a. Whether sources are given<br>b. Whether references are given or hyperlinked in text                                                   |
| Disclosure                                       | a. Whether application ownership disclosed<br>b. Whether application sponsorship disclosed                                               |

|                               |                                                                                                                                       |
|-------------------------------|---------------------------------------------------------------------------------------------------------------------------------------|
| Currency                      | <p>a. Whether application has been modified in the past month</p> <p>b. Whether application has included a last modification date</p> |
| <b>Cumulative total score</b> | <b>9 points</b>                                                                                                                       |

Table 1: Categories for assessment of information quality based on the Silberg Scale

### Methodology of scoring and assessment

The first author MWBZ and authors IAZ and TW were involved in the extraction of the relevant information and the initial analysis and scoring of each of the respective applications. If there were any disagreements amongst the authors, it was resolved with discussion.

### Data analysis

The data collated were analyzed using descriptive statistics. The frequency, mean and standard deviation were computed based on the scores acquired from the Silberg scale.

### Results

#### Core Characteristic of Postnatal Depression Applications

A cumulative total of 14 applications were included for analysis. Table 2 provides an overview of the applications which were identified and further analysed. Table 2 also summarizes the core characteristics of the applications.

----- Insert Table 2 -----

| Name of Applications          | Platform        | General Description                                                                                                                 | Silberg Sore |
|-------------------------------|-----------------|-------------------------------------------------------------------------------------------------------------------------------------|--------------|
| Anxiety and Depression Scales | Android         | Include questionnaire for the evaluation of depression and anxiety                                                                  | 3            |
| Self Help                     | Android         | Include leaflets about various mental health disorder                                                                               | 7            |
| Pregnancy Week by Week        | Android         | Guide to conception, pregnancy, taking care of baby and being a parent                                                              | 2            |
| Mental Health Assessments     | Android         | Include sets of common questionnaires for assessment of various psychiatric disorders                                               | 2            |
| Baby Care Week by Week: Tips  | Android         | Baby development week by week and parenting tips in one baby app. Contains information, audio and video about postnatal depression. | 2            |
| First time moms               | Android         | Pregnancy guide and information about how to deal with postpartum depression                                                        | 3            |
| New Baby New Life             | Android / Apple | Podcasts focusing on hypnosis for postnatal depression                                                                              | 1            |
| GoMum                         | Android         | CBT based activities and information about postpartum depression                                                                    | 4            |
| Postnatal yoga                | Android         | Yoga exercises for postnatal mothers who are suffering from postnatal depression or anxiety                                         | 2            |
| Bump 2 Breast                 | Android         | Information about child caring as well as                                                                                           | 3            |

|                           |         |                                                                                                                                                                                     |   |
|---------------------------|---------|-------------------------------------------------------------------------------------------------------------------------------------------------------------------------------------|---|
|                           |         | postpartum depression                                                                                                                                                               |   |
| Your personal health      | Android | Collection of surveys and assessment                                                                                                                                                | 2 |
| What were we thinking     | Apple   | Educational information with videos and functions for postnatal depression                                                                                                          | 5 |
| Essential Baby Care Guide | Apple   | Educational information covering topics such as feeding, sleeping, care and development and first aid skills in the form of videos. Also contains video about postnatal depression. | 3 |
| PPD Screening             | Apple   | Includes the Edinburgh postnatal depression scale to evaluate for depressive symptoms                                                                                               | 3 |

Table 2: Core Functionalities of postnatal depression application that are included in the current analysis

### Information Quality Analysis

For the 14 applications, the average Silberg score was that of 3.0 with a standard deviation of 1.52, out of a total score of 9 points. 8 out of the total of 15 applications have a score that is greater than or equal to the mean score of 3.0. All the applications (100.0%) have disclosed the date of creation or last modification, but none of the applications have highlighted the last date of modification of the application. Most of the applications have disclosed the ownership of the applications (93.9%). Only 28.6% of the identified applications have provided references for the information they have included.

The current gaps in the information quality pertains to the currency of the application (whether there have been any modifications in the past month) (0%), as well as the disclosure of the affiliations (14.2%) and credentials of the authors (7.14%). In addition, a good proportion of the applications also did not disclose whether there are sponsorship for the application (7.14%). Table 3 provides a summary of the mean scores for each of the individual categories, as well, as the mean percentage of applications fulfilling the each of the criteria.

| Category                                      | Mean Scores | Standard Deviation |
|-----------------------------------------------|-------------|--------------------|
| Authorship – Identification of Authors        | 0.143       | 0.363              |
| Authorship – affiliations of Authors          | 0.143       | 0.363              |
| Authorship – credentials of Authors           | 0.071       | 0.267              |
| Attribution – Sources                         | 0.286       | 0.469              |
| Attribution – Provision of reference          | 0.286       | 0.469              |
| Disclosure – Ownership of applications        | 0.929       | 0.267              |
| Disclosure – Sponsorship                      | 0.071       | 0.267              |
| Currency – Modification within the past month | 0.0         | 0                  |
| Currency – Disclosure of date of              | 1.0         | 1.0                |

|                   |  |  |
|-------------------|--|--|
| last modification |  |  |
|-------------------|--|--|

## Discussion

This is perhaps one of the first study that has been conducted to date that looks into the information quality of postnatal depression smartphone applications. To date, there has only been systematic reviews about E-Health innovations for postnatal depression. There remains a lack of analysis about the information quality of smartphone based postnatal depression applications. Our search revealed that only a limited number of applications (n=14) contains information or has functionalities related to postnatal depression, among the myriad of applications yielded when we initially applied our search strategy. Our current research highlighted that the average Silbeg score for postnatal applications was that of 3.0, with a standard deviation of 1.52. 8 out of the cumulative total of 14 applications scored more than or equal to the average score. Whilst the vast majorities of the applications have provided information about creation dates and ownership of applications, only a limited number have furnished information pertaining to the references for the information shared within the application. Prior studies have utilized the same scale for cardiovascular applications and the average score was that of 2.87 [16]. Other studies have utilized the scale for obesity applications and the average score was 4.0 [15]. There are commonalities in the domains in which information is deemed to be lacking. Zhang et al. [15] reported that amongst the 39 obesity applications sampled, the vast majorities did not provide information about references, full disclosure of sponsorship and whether the application has been modified in the last month. Xiao Q et al. [14] have also reported similar findings.

Based on the current review, it is obvious that most of the applications are lacking in several aspects and hence the resultant low scores on the Silberg scale. It is of importance that smartphone applications not only contain appropriate information, but smartphone applications do need to have appropriate references as well as cite the authors responsible for the creation of the informational contents. This is especially important for postnatal related applications, as these applications do frequent provide information not only for the new mothers, but also information relating to the care of their newborn babies. Zhang et al. [14] have previously proposed and highlighted the importance of having healthcare professionals in the joint conceptualization of smartphone applications, as well as having a governmental regulatory body to help in the assessment of applications which are deemed safe and reliable for the general public to utilize. From our knowledge, the Royal College of Psychiatrists is one of the organization that has provided the general public with mental health leaflets (both in print and online version) that is carefully curated in terms of information quality. The College have been successful in doing so, by ensuring that there is a group of experts to draft as well as to provide periodic timely updates to the mental health leaflets, to ensure that the information is kept current, as well as accurate. This strategy is perhaps how the college has been granted the United Kingdom's information safety standards for the information they have included in their leaflets for dissemination to the general public.

Zhang et al. [15] in their previous analysis of the information quality of bariatric related applications have highlighted several reasons for the lack of provision of references for the information sources. The authors previously pointed out how variations in screen size might results in technical difficulties with the integration of reference sources. However, with the recent advances in smartphone application development, especially with the usage of cross-platform programming techniques, this issue could potentially be overcome, as the newer programming techniques would ensure the compatibility of the

1  
2  
3 application across a myriad of varying devices as well as screen sizes. In addition, one of the reasons as  
4 to why most of the applications have not been updated recently nor indicated a date of last update has  
5 to do much with the way the applications have been developed. Most of the current conceptualizations  
6 relies heavily on coding informational content within the application, and hence updating the contents  
7 within the application would be an issue. In the conceptualization of further applications, it would be  
8 recommended for application developers and healthcare professionals to jointly consider the  
9 integration of a dynamic content management system, such that the information contents within the  
10 application could be updated in real-time and kept current.  
11  
12

13  
14 In our current study, we have managed to identify some of the core functionalities of postnatal  
15 applications. Most of the identified applications are limited to the provision of pregnancy related  
16 information and psycho-educational information to new mothers. Several of these applications provide  
17 validated screening tools for the assessment of postnatal depressive symptoms. To our knowledge,  
18 there has only been one application that has included a cognitive behavioral therapy component as an  
19 intervention. From a clinical perspective, it would be helpful if there are more applications that have  
20 included a therapeutic component within the application.  
21  
22

23 One of the major strengths of the current study is that we managed to make use of a validated scale  
24 evaluate the information quality of postnatal depression applications that are currently available on the  
25 app stores. The usage of the scale has enabled us to determine the limitations in the information  
26 quality. In addition, as the same scale has also been utilized in the evaluation of other applications from  
27 other disciplines, we are able to compare and elucidate the common issues underlying the gaps in  
28 information quality across a spectrum of applications. The findings would be of relevance to regulatory  
29 bodies who are planning for policies involving smartphone applications. Despite the aforementioned  
30 strengths, there are several limitations of the current study. In our current study, the applications are  
31 identified via either the Apple or the Android application stores. Whilst these are the two most common  
32 application stores, there might be very different applications available on the other platforms which we  
33 have not evaluated. In addition, we have limited the search strategy to applications that are in English  
34 language. We do acknowledge that there are multiple applications in other languages such as Spanish.  
35 Whilst the authors have extracted the applications from the store over a duration of one month, with  
36 the rapid development of smartphone applications using new technologies of cross-platform  
37 programming, it is not unexpected that new applications deployed onto the store after the period of  
38 evaluation are not considered. The Silberg scale might have well been validated across several studies  
39 for the evaluation of the information quality, but it is not specific for information quality for smartphone  
40 applications and does not cover and assess for other aspects of the smartphone application, such as  
41 usability and levels of engagement. More recently, researchers have proposed the utilization of the  
42 Mobile Application Rating Scale [16] for the evaluation of smartphone applications. Whilst the Mobile  
43 Application Rating Scale appears to be comprehensive, one of the concerns the authors have is that  
44 there are only 4 questions looking into the information quality, which asked about only the quality,  
45 quantity, visual presentation and credibility of sources.  
46  
47  
48  
49  
50  
51

## 52 **Conclusions**

53  
54 Postnatal depression has an impact on the well-being of new mothers as well as their offspring, and  
55 hence it is clearly a disorder of importance, that warrants early screening and intervention. E-health  
56 interventions have been demonstrated to be efficacious and there are M-health interventions deployed  
57  
58  
59  
60

1  
2  
3 in low and middle income countries, that has been evaluated by research. However, there remains a  
4 myriad of postnatal applications on the application store. It is pertinent for us to determine not only the  
5 contents within these applications, as well as apply validated scales to assess their information quality.  
6 Similar to bariatric and cardiovascular applications, there remains paucity of disclosures in various  
7 domains. Further conceptualizations and research on postnatal M-health interventions should target  
8 these areas identified in the current review.  
9  
10

### 11 **Acknowledgements**

12  
13 The current study has received no funding support.  
14

### 15 **Disclosure statement:**

16  
17 The authors declare that they have no competing interests.  
18

### 19 **Figure Legends:**

20  
21 Figure 1: Flow chart showing the selection process of smartphone applications related to postnatal care  
22  
23  
24  
25  
26  
27  
28  
29  
30  
31  
32  
33  
34  
35  
36  
37  
38  
39  
40  
41  
42  
43  
44  
45  
46  
47

### 48 **References:**

- 49  
50 1. Maternal Mental Health. World Health Organization. Extracted from  
51 [http://www.who.int/mental\\_health/maternal-child/maternal\\_mental\\_health/en/](http://www.who.int/mental_health/maternal-child/maternal_mental_health/en/), last assessed  
52 on 1<sup>st</sup> December 2016.  
53  
54 2. Postpartum depression: Literature review of risk factors and interventions. World Health  
55 Organization. Extracted from  
56 [http://www.who.int/mental\\_health/prevention/suicide/lit\\_review\\_postpartum\\_depression.pdf](http://www.who.int/mental_health/prevention/suicide/lit_review_postpartum_depression.pdf),  
57 last assessed on 1<sup>st</sup> December 2016.  
58  
59  
60



3. Perinatal Anxiety and Depression Australia (2012). Extracted from <http://www.panda.org.au/news/412-research-reveals-the-alarming-economic-cost-of-postnatal-depression->, last assessed on the 28<sup>th</sup> November 2016.
4. Depression: Clinical Practice Guidelines. Ministry of Health, Singapore. Extracted from [https://www.moh.gov.sg/content/dam/moh\\_web/HPP/Doctors/cpg\\_medical/current/2012/depression/Depression%20CPG\\_R14\\_FINAL.pdf](https://www.moh.gov.sg/content/dam/moh_web/HPP/Doctors/cpg_medical/current/2012/depression/Depression%20CPG_R14_FINAL.pdf), last assessed on 1<sup>st</sup> December 2016.
5. B.K. Puri, A. Hall and R. Ho (2014). Revision Notes in Psychiatry. London, UK: CRC Press, pp. 564-566
6. Nonnenmacher N, Noe D, Ehrental JC, Reck C. Postpartum bonding: the impact of maternal depression and adult attachment style. Arch Womens Ment Health. 2016 Oct;19(5):927-35. doi: 10.1007/s00737-016-0648-y.
7. Liu Y, Kaaya S, Chai J, McCoy DC, Surkan PJ, Black MM, Sutter-Dallay AL, Verdoux H, & Smith-Fawzi MC (2017). Maternal depressive symptoms and early childhood cognitive development: a meta-analysis. Psychol Med.,47(4):680-689. doi: 10.1017/S003329171600283X
8. Korhonen, M., Luoma I., Salmelin, R., & Tamminem, T. (2012). A logitudinal study of maternal prenatal, postnatal and concurrent depressive symptoms and adolescent well-being. Journal of Affective Disorders, 136, 680-692.
9. Bauer A, Pawlby S, Plant DT, King D, Pariante CM, Knapp M. Perinatal depression and child development: exploring the economic consequences from a South London cohort. Psychol Med. 2015 Jan;45(1):51-61. doi: 10.1017/S0033291714001044.
10. Postnatal depression guideline. National Institute for Clinical Excellence. Extracted from <https://www.nice.org.uk/guidance/cg192/chapter/1-Recommendations>, last assessed on 22<sup>nd</sup> November 2016
11. Osma J, Barrera AZ, Ramphos E. Are Pregnant and Postpartum Women Interested in Health-Related Apps? Implications for the Prevention of Perinatal Depression. Cyberpsychol Behav Soc Netw. 2016 Jun;19(6):412-5. doi: 10.1089/cyber.2015.0549.
12. Lee EW, Denison FC, Hor K, Reynolds RM. Web-based interventions for prevention and treatment of perinatal mood disorders: a systematic review. BMC Pregnancy Childbirth. 2016 Feb 29;16:38. doi: 10.1186/s12884-016-0831-1.
13. Amoakoh-Coleman M, Borgstein AB, Sondaal SF, Grobbee DE, Miltenburg AS, Verwijs M, Anshah EK, Browne JL, Klipstein-Grobusch K. Effectiveness of mHealth Interventions Targeting Health Care Workers to Improve Pregnancy Outcomes in Low- and Middle-Income Countries: A Systematic Review. J Med Internet Res. 2016 Aug 19;18(8):e226. doi: 10.2196/jmir.5533.
14. Zhang MW, Ho RC, Cheek CCS. Technological Innovations in mental healthcare: Harnessing the digital revolution. Br J Psychiatry 2-15;206:263-265.
15. Zhang MW, Ho RC, Hawa R, Sockalingam S. Analysis of the Information Quality of Bariatric Surgery Smartphone Applications Using the Silberg Scale. Obes Surg. 2016 Jan;26(1):163-8. doi: 10.1007/s11695-015-1890-5. Review.
16. Xiao Q, Lu S, Wang Y, Sun L, Wu Y. Current Status of Cardiovascular Disease-Related Smartphone Apps Downloadable in China. Telemed J E Health. 2016 Jun 29. [Epub ahead of print]
17. Stovold et al. (2014). Study flow diagrams in Cochrane systematic review updates: an adapted PRISMA flow diagram. Systematic Reviews, 3:54 doi:10.1186/2046-4053-3-54
18. Griffiths KM, Christensen H. Quality of Web-based information on the treatment of depression: a cross-section survey. BMJ. 2000;321(7275):1511-5.

- 1  
2  
3  
4  
5  
6  
7  
8  
9  
10  
11  
12  
13  
14  
15  
16  
17  
18  
19  
20  
21  
22  
23  
24  
25  
26  
27  
28  
29  
30  
31  
32  
33  
34  
35  
36  
37  
38  
39  
40  
41  
42  
43  
44  
45  
46  
47  
48  
49  
50  
51  
52  
53  
54  
55  
56  
57  
58  
59  
60
19. Domnich A, Arata L, Amicizia D, Signori A, Patrick B, Stoyanov S, Hides L, Gasparini R, Panatto D. Development and validation of the Italian version of the Mobile Application Rating Scale and its generalisability to apps targeting primary prevention. BMC Med Inform Decis Mak. 2016 Jul 7;16:83. doi: 10.1186/s12911-016-0323-2.

For peer review only

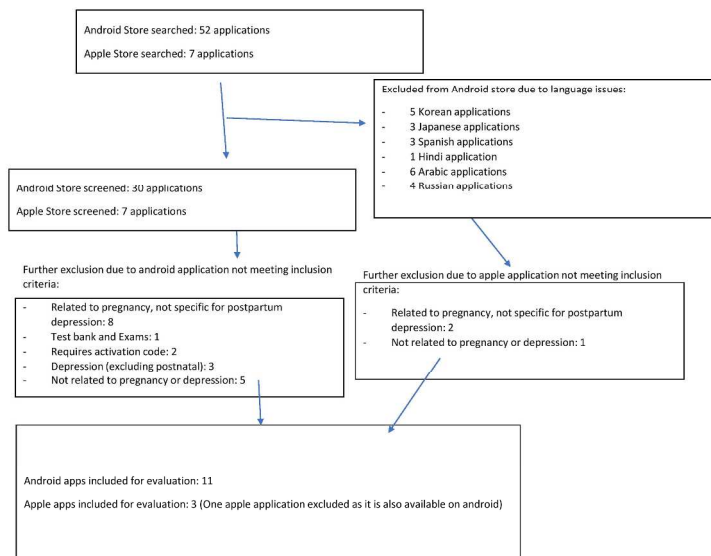

Figure 1: Flowchart of the selection of smartphone applications

338x190mm (300 x 300 DPI)

| App Name                                        | Remarks | Reviewer | Authors cr | Author aff | Author credentials |
|-------------------------------------------------|---------|----------|------------|------------|--------------------|
| Postnatal Yoga                                  | Google  | MZ       | 0          | 0          | 0                  |
| Baby Care Week by Weeks. Tips                   | Google  | MZ       | 0          | 0          | 0                  |
| Self Help                                       | Google  | MZ       | 1          | 1          | 1                  |
| Anxiety and Depression Scale                    | Google  | MZ       | 0          | 0          | 0                  |
| New Baby, New Life                              | Google  | MZ       | 0          | 0          | 0                  |
| Pregnancy Week by Week                          | Google  | MZ       | 0          | 0          | 0                  |
| Mental Health Assessments                       | Google  | MZ       | 0          | 0          | 0                  |
| First time Moms                                 | Google  | MZ       | 0          | 0          | 0                  |
| GoMum                                           | Google  | MZ       | 0          | 0          | 0                  |
| Bump 2 breast                                   | Google  | MZ       | 0          | 0          | 0                  |
| Your personal health                            | Google  | MZ       | 0          | 0          | 0                  |
| What were we thinking!                          | Apple   | MZ       | 1          | 1          | 0                  |
| PPD screening                                   | Apple   | MZ       | 0          | 0          | 0                  |
| Essential Baby Care Guide - The essential parer | Apple   | MZ       | 0          | 0          | 0                  |

1  
2  
3  
4  
5  
6  
7  
8  
9  
10  
11  
12  
13  
14  
15  
16  
17  
18  
19  
20  
21  
22  
23  
24  
25  
26  
27  
28  
29  
30  
31  
32  
33  
34  
35  
36  
37  
38  
39  
40  
41  
42  
43  
44  
45  
46  
47  
48  
49  
50  
51  
52  
53  
54  
55  
56  
57  
58  
59  
60

| Information sources | References given/hy | Application ownersh | Sponsorship disclose | Application modific |
|---------------------|---------------------|---------------------|----------------------|---------------------|
| 0                   | 0                   | 1                   | 0                    | 0                   |
| 0                   | 0                   | 1                   | 0                    | 0                   |
| 1                   | 1                   | 1                   | 0                    | 0                   |
| 0                   | 1                   | 1                   | 0                    | 0                   |
| 0                   | 0                   | 0                   | 0                    | 0                   |
| 0                   | 0                   | 1                   | 0                    | 0                   |
| 0                   | 0                   | 1                   | 0                    | 0                   |
| 1                   | 0                   | 1                   | 0                    | 0                   |
| 1                   | 1                   | 1                   | 0                    | 0                   |
| 0                   | 0                   | 1                   | 0                    | 0                   |
| 0                   | 0                   | 1                   | 0                    | 0                   |
| 0                   | 0                   | 1                   | 0                    | 0                   |
| 0                   | 0                   | 1                   | 1                    | 0                   |
| 0                   | 1                   | 1                   | 0                    | 0                   |
| 1                   | 0                   | 1                   | 0                    | 0                   |

For peer review only

**Creation/last-modifi Total score**

|    |   |   |
|----|---|---|
| 1  |   |   |
| 2  |   |   |
| 3  | 1 | 2 |
| 4  | 1 | 2 |
| 5  | 1 | 7 |
| 6  | 1 | 3 |
| 7  | 1 | 1 |
| 8  | 1 | 2 |
| 9  | 1 | 2 |
| 10 | 1 | 2 |
| 11 | 1 | 3 |
| 12 | 1 | 4 |
| 13 | 1 | 3 |
| 14 | 1 | 2 |
| 15 | 1 | 2 |
| 16 | 1 | 5 |
| 17 | 1 | 3 |
| 18 | 1 | 3 |
| 19 |   |   |
| 20 |   |   |
| 21 |   |   |
| 22 |   |   |
| 23 |   |   |
| 24 |   |   |
| 25 |   |   |
| 26 |   |   |
| 27 |   |   |
| 28 |   |   |
| 29 |   |   |
| 30 |   |   |
| 31 |   |   |
| 32 |   |   |
| 33 |   |   |
| 34 |   |   |
| 35 |   |   |
| 36 |   |   |
| 37 |   |   |
| 38 |   |   |
| 39 |   |   |
| 40 |   |   |
| 41 |   |   |
| 42 |   |   |
| 43 |   |   |
| 44 |   |   |
| 45 |   |   |
| 46 |   |   |
| 47 |   |   |
| 48 |   |   |
| 49 |   |   |
| 50 |   |   |
| 51 |   |   |
| 52 |   |   |
| 53 |   |   |
| 54 |   |   |
| 55 |   |   |
| 56 |   |   |
| 57 |   |   |
| 58 |   |   |
| 59 |   |   |
| 60 |   |   |

Peer review only

# BMJ Open

## Current Status of Postnatal Depression Smartphone Applications available on Application Stores: An Information Quality Analysis

|                                 |                                                                                                                                                                                                                                                                                                                                                                                                                                                                                                                                                                                                                                                                                                                                                                                 |
|---------------------------------|---------------------------------------------------------------------------------------------------------------------------------------------------------------------------------------------------------------------------------------------------------------------------------------------------------------------------------------------------------------------------------------------------------------------------------------------------------------------------------------------------------------------------------------------------------------------------------------------------------------------------------------------------------------------------------------------------------------------------------------------------------------------------------|
| Journal:                        | <i>BMJ Open</i>                                                                                                                                                                                                                                                                                                                                                                                                                                                                                                                                                                                                                                                                                                                                                                 |
| Manuscript ID                   | bmjopen-2016-015655.R2                                                                                                                                                                                                                                                                                                                                                                                                                                                                                                                                                                                                                                                                                                                                                          |
| Article Type:                   | Research                                                                                                                                                                                                                                                                                                                                                                                                                                                                                                                                                                                                                                                                                                                                                                        |
| Date Submitted by the Author:   | 25-Aug-2017                                                                                                                                                                                                                                                                                                                                                                                                                                                                                                                                                                                                                                                                                                                                                                     |
| Complete List of Authors:       | Zhang, Melvyn; National University of Singapore, Psychological Medicine<br>Ho, Roger; National University of Singapore, Department of Psychological Medicine<br>Loh, Alvona; National University Singapore Yong Loo Lin School of Medicine, Psychological Medicine<br>Wing, Tracey; National Healthcare Group<br>Wynne, Olivia; University of Newcastle<br>Chan, Sally; University of Newcastle, Australia, School of Nursing and Midwifery<br>Car, Josip; Nanyang Technological University, Health Services and Outcomes Research Programme, Lee Kong Chian School of Medicine; Imperial College London, Global eHealth Unit, Department of Primary Care and Public Health, School of Public Health<br>Fung, Daniel Shuen Sheng; Institute of Mental Health, Research Division |
| <b>Primary Subject Heading</b>: | Obstetrics and gynaecology                                                                                                                                                                                                                                                                                                                                                                                                                                                                                                                                                                                                                                                                                                                                                      |
| Secondary Subject Heading:      | Mental health                                                                                                                                                                                                                                                                                                                                                                                                                                                                                                                                                                                                                                                                                                                                                                   |
| Keywords:                       | postnatal depression, Silberg scale, MHealth                                                                                                                                                                                                                                                                                                                                                                                                                                                                                                                                                                                                                                                                                                                                    |
|                                 |                                                                                                                                                                                                                                                                                                                                                                                                                                                                                                                                                                                                                                                                                                                                                                                 |

SCHOLARONE™  
Manuscripts

1  
2  
3 **Current Status of Postnatal Depression Smartphone Applications available on Application Stores: An**  
4 **Information Quality Analysis**  
5

6 **Melvyn WB Zhang MBBS, DCP, MRCPsych<sup>1</sup>, Roger CM Ho MBBS, MRCPsych<sup>2</sup>, FRCPC, Loh**  
7 **Alvona<sup>2</sup>, Tracey Wing, MBBS<sup>3</sup>, Olivia Wynne, PhD<sup>4</sup>, Sally WC Chan PhD, RN, FAAN<sup>4</sup>, Josip Car**  
8 **MD PhD MSc FFPH FRCP (Edin)<sup>5</sup>, Daniel SS Fung MBBS, MMed(Psychiatry), FAMS<sup>5</sup>**  
9  
10

11  
12 **Author Details:**  
13

14 <sup>1</sup>National Addictions Management Service, Institute of Mental Health, Singapore

15 <sup>2</sup>Department of Psychological Medicine, Yong Loo Lin School of Medicine, National University of  
16 Singapore, Singapore

17 <sup>3</sup>National Psychiatry Residency Program, National Healthcare Group, Singapore

18 <sup>4</sup>Faculty of Health & Medicine School of Nursing and Midwifery, University of Newcastle, New South  
19 Wales, Australia.

20 <sup>5</sup>LKC School of Medicine, Nanyang Technological University, Singapore

21 <sup>6</sup>Institute of Mental Health, Singapore  
22  
23  
24  
25  
26  
27  
28

29 Corresponding author:

30 Melvyn Zhang

31 Associate Consultant (Psychiatrist)

32 Email: melvynzhangweibin@gmail.com  
33  
34

35 Address:

36 10 Buangkok Green Medical Park

37 Institute of Mental Health Singapore

38 Singapore 539747  
39

40 Mainline: 65-63892504

41 Fax: 65-63892222

42 Total number of Figures: 1

43 Total number of Tables: 3

44 Number of words: 3914

45 Total number of References: 17  
46  
47

48 Keywords: M-Health, Smartphones, Postnatal Depression, Information Quality

49 Competing Interests: The authors declare that they have no competing interests.

50 Authors' contribution: All the authors jointly conceptualized the current research idea.  
51  
52

53 Authors' contributions:

54 Study conceptualization: MZ, SC, RCMH jointly conceptualized the existing study

55 Data extraction: MZ, LA, TW assisted in the extraction of the data from the application stores.  
56  
57  
58  
59  
60



1  
2  
3 Data analysis: MZ, LA, TW were involved in the initial analysis, and RCMH provided guidance with the  
4 analysis

5 Initial draft: MZ, LA, TW, SC, OW, RCMH jointly wrote up the initial draft of the manuscript.

6  
7 2<sup>nd</sup> Revision: DF & JC provided guidance for the 2<sup>nd</sup> revision. The 2<sup>nd</sup> revision of the manuscript was  
8 undertaken by MZ and RCMH. The 3<sup>rd</sup> revision of the manuscript was undertaken by MZ.

9 All authors have proof-read the manuscript prior to submission.

10  
11 Data-sharing statement: All data used for preparation of this manuscript has been included within the  
12 manuscript.  
13

14  
15  
16  
17  
18  
19  
20  
21  
22  
23  
24  
25  
26  
27  
28  
29  
30  
31  
32  
33  
34  
35  
36  
37  
38  
39  
40  
41  
42  
43  
44  
45  
46  
47  
48  
49  
50  
51  
52  
53  
54  
55  
56  
57  
58  
59  
60

For peer review only

**Abstract****Objectives**

It is the aim of the current research to identify not only some common functionalities of postnatal application, but also to determine the quality of the information content of postnatal depression application using validated scales that have been applied for applications in other specialities.

**Settings and Participants:**

To determine the information quality of the postnatal depression smartphone applications, the two most widely used smartphone application stores, namely that of Apple iTunes as well as Google Android Play store were searched between 20<sup>th</sup> through to 31<sup>st</sup> May. No participants were involved. The inclusion criteria for the application was that it must have been searchable using the keywords “postnatal”, “pregnancy”, “perinatal”, ‘postpartum’ and “depression” and must be in English language.

**Intervention:**

The Silberg scale was used in the assessment of the information quality of the smartphone applications.

**Primary and Secondary Outcomes Measure:**

The information quality score was the primary outcome measure.

**Results:**

Our current results highlighted that whilst there is currently a myriad of applications, only fourteen applications are specifically focused on postnatal depression. In addition, the majority of the currently available applications on the store have only disclosed their last date of modification as well as ownership. There remain very limited disclosures about the information of the authors, as well as the references for the information included in the application itself. The average score for the Silberg scale for the postnatal applications we have analysed is that of 3.0.

**Conclusions:**

There remains a need for healthcare professionals and developers to jointly conceptualize new applications with better information quality and evidence base.

**Trial registration:**

Not applicable, as this is a systematic review

1  
2  
3  
4  
5  
6  
7  
8  
9  
10  
11  
12  
13  
14  
15  
16  
17  
18  
19  
20  
21  
22  
23  
24  
25  
26  
27  
28  
29  
30  
31  
32  
33  
34  
35  
36  
37  
38  
39  
40  
41  
42  
43  
44  
45  
46  
47  
48  
49  
50  
51  
52  
53  
54  
55  
56  
57  
58  
59  
60

Strengths:

1. We have made use of a comprehensive search strategy to characterize the functionalities of the postnatal applications that are currently available on the 2 most popular application stores.
2. We have applied the Silberg scale, which is a validated information quality scale in the assessment of the information quality of postnatal application.
3. Our study findings are replicable, in that similar assessment could be conducted for applications in other specialities.
4. We have identified several gaps in information quality, which clinicians and researchers need to be cognizant of.

Limitations:

1. We have not been able to evaluate non-English language applications.
2. The applications available on the app store are rapidly changing in numbers and content; our current analysis is based on a cross-sectional analysis.
3. We have not evaluated the applications for their levels of engagement and aesthetics.

## Introduction

The World Health Organization (WHO), in its latest report has highlighted that approximately 10% of mothers suffer from depression during their pregnancy [1]. Postnatally, the figures for depression increases to that of 13% [1]. The World Health Organization has pointed out that the prevalence of depression varies in accordance to the regions, with low and middle income developing countries having a higher prevalence of postnatal depression (PND) [1]. Some of the core symptoms in PND includes that of low mood, marked reduction in self-esteem, loss of interest and enjoyment as well as tearfulness. Some women also report of hopeless as well as excessive fatigue [2]. In addition, it is also not uncommon for mothers to report of increased anxiety with regards to their baby's well-being [2]. Such anxiety symptoms might in turn result in a diminished affection for their baby as well as breastfeeding related difficulties [2]. It is essential for PND to be screened for and detected early, given that untreated PND does have consequential effects not only for mothers themselves, but also for their newborn. Clearly, PND could increase the risk of new mothers harming themselves or their children if they are severely depressed, or if they have had symptoms of psychotic depression. For the newborn, there have been recent studies that have highlighted how the postpartum bonding could be adversely affected due to the presence of depressive symptoms in a new mother [3]. The poor postpartum bonding could also result in consequential attachment issues in the newborn, that could be carried into adulthood [3]. In particular, newborn tend to have insecure attachment to their parental figures. Aside from attachment related issues, children born of mothers with underlying postnatal depression do commonly have resultant cognitive issues [4] as well as language and expressive issues. Other longitudinal studies conducted have demonstrated that PND have a consequential impact on the well-being of children [5].

From a public policy perspective, postnatal depression and its associated morbidity and mortality would lead to a tremendous burden in healthcare. Studies have been conducted in the United Kingdom, which have shown that postnatal depression has on the average led to a massive reduction not only in earnings, but also a reduction in the health-related quality of life [6]. Hence, there is thus a need for early identification and various interventions for treatment. Based on the recommendations of the National Institute for Clinical Excellence (NICE) guidelines, there are different approaches to deal with the issue of postnatal depression and the main determinant for this would be that of the severity of the depressive symptoms. Based on the stepped care recommendations of the NICE guidelines, women with sub-threshold levels of depression could receive self-help programs [7]. However, psychological based treatment, such as that of cognitive behavioral therapy, along with medications would be recommended for mothers diagnosed with mild to moderately severe postnatal depression [7]. Medications that are indicated for the treatment of postnatal depression include that of the tricyclic antidepressants as well as the selective serotonin reuptake inhibitors [7]. For mothers with severe depression, who are clearly at risk to either themselves or to their baby, inpatient admission and treatment would be recommended and would be warranted. It is of importance to recognize that the NICE guidelines [7] recommend the provision of pertinent information related to mental health to all women of childbearing potential. Information provision to postnatal mothers is of utmost importance as prior research (Youash S et al., 2013) have highlighted that there was a correlation with the amount of pre-and postnatal health information provided and the subsequent scores on the depressive scale [8]. There has also been research highlighting the importance or prenatal education in ensuring that women receive information about postnatal depression [9].

1  
2  
3 In the recent years, technology has become an integral part of healthcare. E-health (Electronic Health)  
4 as well M-Health (Mobile Health) are increasingly being used as tools for healthcare. There have been  
5 recent studies that has highlighted that new mothers and those who are suffering from postnatal  
6 depression are interested in the utilization of a health application [10]. These findings are of significance,  
7 as it would mean that new mothers are not averse to the usage of technology in helping them manage  
8 their mood related symptoms and conditions. Clearly, one of the major challenges faced by all new  
9 mothers is that of time management, and setting time aside for a medical consultation might be  
10 difficult. In addition, in some countries like that of Australia and Canada, there might be geographical  
11 barriers that prevent these new mothers from seeking the appropriate help. To date, there has been  
12 quite a few trials evaluating the potential primarily of E-Health in supporting new mothers with  
13 postnatal depression. Lee et al. (2016) [11] recently conducted a systematic review and have highlighted  
14 that E-health is indeed a feasible option and a cost-effective solution. However, there remains a paucity  
15 of research studies evaluating the potential of m-health and smartphone applications for postnatal  
16 depression. Most of the published research to date have highlighted how these tools are useful for  
17 healthcare workers in the low and middle-income countries, and the existing tools only provide basic  
18 psycho-educational information [12].

19  
20  
21  
22  
23  
24 Zhang et al. (2015) [13] have previously highlighted the importance of healthcare professionals'  
25 involvement in the conceptualization of smartphone based interventions. More importantly, Zhang et al.  
26 (2015) [13] have also highlighted the need for current applications to be further evaluated in terms of  
27 their informational contents using validated scales. Such an analysis is critical, given that there is a  
28 myriad of other post-natal applications on the application stores. In addition, prior research done on  
29 obesity applications [14] as well as cardiovascular applications [15] have highlighted that there are  
30 several shortcomings inherent in the applications currently available on the app store.

31  
32  
33 Given this, it is the main aim of the current research to determine the quality of the information content  
34 of postnatal application using validated scales that have been applied for applications in other  
35 specialities. It is also the secondary aim of the current research to systematically characterize some of  
36 the common functionalities of postnatal applications.

## 37 38 39 40 **Methodology**

### 41 42 **Selection of Smartphone Applications**

43  
44 To determine the information quality of the postnatal depression smartphone applications, the two  
45 most widely used smartphone application stores, namely that of Apple iTunes as well as Google Android  
46 Play store were searched between 20<sup>th</sup> May 2017 through to 31<sup>st</sup> May 2017.

47  
48  
49 The following keywords were utilized in the search strategy, that of "postnatal", "pregnancy",  
50 "perinatal", "postpartum" and "depression." The search yielded a cumulative total of 59 applications,  
51 with 52 applications from the Google Android store and 7 applications from the Apple iTunes store. 18  
52 applications were excluded from the Android store as they were not in English language and the authors  
53 have had difficulties with evaluation of these applications given the language barriers. After reviewing  
54 the description of the applications, a cumulative total of 22 applications were excluded as they were of  
55 no relevance. The details for the exclusion of these applications are included in Figure 1. If both a free  
56  
57  
58  
59  
60

and a paid version were available on the store, both versions were downloaded for further evaluation. Any duplicated smartphone applications were removed. If a duplicated version of an application was offered on both platform, only version (that on the android platform) would be downloaded for further evaluation.

Each of the respective application were downloaded on either an Apple iPhone 6s device (for the Apple Platform running IOS operating system 10.1) or on a Xiaomi Note 3 (For the Android Platform running Android Marshmallow operating system). At the end, a total of 14 applications were included for the evaluation of their underlying information quality. Figure 1 illustrates the selection process for the smartphone applications.

----- Insert Figure 1 -----

### Analysis of the Information Quality of Smartphone Applications

To date, there remains no standardized scale that has been recommended by any guidelines for the assessment of application quality as well as for the analysis of the information quality of smartphone applications. Hence, the authors have decided to make use of the 9-points Silberg scale [16], which was initially developed by Griffiths and Christensen (2002) [16] and have been extensively to determine the quality of information furnished via online websites [16] as well as the quality of information inherent in smartphone applications [16]. Notably, the same scale has been recently utilized by researchers in the analysis of the information quality of bariatric applications as well as cardiovascular applications [14,15]. The Silberg scale takes into consideration the following domains, as illustrated in Table 1. The total cumulative score possible is that of 9 points and a higher score is indicative of better information quality.

----- Insert Table 1 -----

| Categories for assessment of information quality | Individual sub-scale items                                                                                                                                                                             |
|--------------------------------------------------|--------------------------------------------------------------------------------------------------------------------------------------------------------------------------------------------------------|
| Authorship                                       | <ul style="list-style-type: none"> <li>a. Whether authors are identified</li> <li>b. Whether affiliations of author are identified</li> <li>c. Whether credentials of authors are furnished</li> </ul> |
| Attribution of information sources               | <ul style="list-style-type: none"> <li>a. Whether sources are given</li> <li>b. Whether references are given or hyperlinked in text</li> </ul>                                                         |
| Disclosure                                       | <ul style="list-style-type: none"> <li>a. Whether application ownership disclosed</li> <li>b. Whether application sponsorship disclosed</li> </ul>                                                     |
| Currency                                         | <ul style="list-style-type: none"> <li>a. Whether application has been modified in the past month</li> <li>b. Whether application has included a last modification date</li> </ul>                     |
| <b>Cumulative total score</b>                    | <b>9 points</b>                                                                                                                                                                                        |

Table 1: Categories for assessment of information quality based on the Silberg Scale

### Methodology of scoring and assessment

The first author MWBZ and authors IAZ and TW were involved in the extraction of the relevant information and the initial analysis and scoring of each of the respective applications. If there were any disagreements amongst the authors, it was resolved with discussion.

## Data analysis

The data collated were analyzed using descriptive statistics. The frequency, mean and standard deviation were computed based on the scores acquired from the Silberg scale.

## Results

### Core Characteristic of Postnatal Depression Applications

A cumulative total of 14 applications were included for analysis. Table 2 provides an overview of the applications which were identified and further analysed. Table 2 also summarizes the core characteristics of the applications.

----- Insert Table 2 -----

| Name of Applications          | Platform        | General Description                                                                                                                                                                 | Silberg Sore |
|-------------------------------|-----------------|-------------------------------------------------------------------------------------------------------------------------------------------------------------------------------------|--------------|
| Anxiety and Depression Scales | Android         | Include questionnaire for the evaluation of depression and anxiety                                                                                                                  | 3            |
| Self Help                     | Android         | Include leaflets about various mental health disorder                                                                                                                               | 7            |
| Pregnancy Week by Week        | Android         | Guide to conception, pregnancy, taking care of baby and being a parent                                                                                                              | 2            |
| Mental Health Assessments     | Android         | Include sets of common questionnaires for assessment of various psychiatric disorders                                                                                               | 2            |
| Baby Care Week by Week: Tips  | Android         | Baby development week by week and parenting tips in one baby app. Contains information, audio and video about postnatal depression.                                                 | 2            |
| First time moms               | Android         | Pregnancy guide and information about how to deal with postpartum depression                                                                                                        | 3            |
| New Baby New Life             | Android / Apple | Podcasts focusing on hypnosis for postnatal depression                                                                                                                              | 1            |
| GoMum                         | Android         | CBT based activities and information about postpartum depression                                                                                                                    | 4            |
| Postnatal yoga                | Android         | Yoga exercises for postnatal mothers who are suffering from postnatal depression or anxiety                                                                                         | 2            |
| Bump 2 Breast                 | Android         | Information about child caring as well as postpartum depression                                                                                                                     | 3            |
| Your personal health          | Android         | Collection of surveys and assessment                                                                                                                                                | 2            |
| What were we thinking         | Apple           | Educational information with videos and functions for postnatal depression                                                                                                          | 5            |
| Essential Baby Care Guide     | Apple           | Educational information covering topics such as feeding, sleeping, care and development and first aid skills in the form of videos. Also contains video about postnatal depression. | 3            |
| PPD Screening                 | Apple           | Includes the Edinburgh postnatal depression scale to evaluate for depressive symptoms                                                                                               | 3            |

Table 2: Core Functionalities of postnatal depression application that are included in the current analysis

### Information Quality Analysis

For the 14 applications, the average Silberg score was that of 3.0 with a standard deviation of 1.52, out of a total score of 9 points. 8 out of the total of 14 applications have a score that is greater than or equal to the mean score of 3.0. All the applications (100.0%) have disclosed the date of creation or last modification, but none of the applications have highlighted the last date of modification of the application. Most of the applications have disclosed the ownership of the applications (93.9%). Only 28.6% of the identified applications have provided references for the information they have included.

The current gaps in the information quality pertains to the currency of the application (whether there have been any modifications in the past month) (0.0), as well as the disclosure of the affiliations (0.143), identification of the authors (0.143) and credentials of the authors (0.071). In addition, a good proportion of the applications also did not disclose whether there are sponsorship for the application (0.071). Table 3 provides a summary of the mean scores for each of the individual categories, as well, as the mean percentage of applications fulfilling each of the criteria.

| Category                                           | Mean Scores | Standard Deviation |
|----------------------------------------------------|-------------|--------------------|
| Authorship – Identification of Authors             | 0.143       | 0.363              |
| Authorship – affiliations of Authors               | 0.143       | 0.363              |
| Authorship – credentials of Authors                | 0.071       | 0.267              |
| Attribution – Sources                              | 0.286       | 0.469              |
| Attribution – Provision of reference               | 0.286       | 0.469              |
| Disclosure – Ownership of applications             | 0.929       | 0.267              |
| Disclosure – Sponsorship                           | 0.071       | 0.267              |
| Currency – Modification within the past month      | 0.0         | 0                  |
| Currency – Disclosure of date of last modification | 1.0         | 1.0                |
| <b>Average Silberg Score</b>                       | <b>3.0</b>  | <b>1.52</b>        |

Table 3: Mean scores on the individual sub-items on the Silberg scale

### Discussion

This is perhaps one of the first study that has been conducted to date that looks at the information quality of postnatal depression smartphone applications. To date, there has only been systematic reviews about E-Health innovations for postnatal depression. There remains a lack of analysis about the information quality of smartphone based postnatal depression applications. Our search revealed that only a limited number of applications (n=14) contains information or has functionalities related to postnatal depression, among the myriad of applications yielded when we initially applied our search



1  
2  
3 strategy. Our current research highlighted that the average Silbeg score for postnatal applications was  
4 that of 3.0, with a standard deviation of 1.52. 8 out of the cumulative total of 14 applications scored  
5 more than or equal to the average score. Whilst the vast majorities of the applications have provided  
6 information about creation dates and ownership of applications, only a limited number have furnished  
7 information pertaining to the references for the information shared within the application. Prior studies  
8 have utilized the same scale for cardiovascular applications and the average score was that of 2.87 [15].  
9 Other studies have utilized the scale for obesity applications and the average score was 4.0 [14]. There  
10 are commonalities in the domains in which information is deemed to be lacking. Zhang et al. [14]  
11 reported that amongst the 39 obesity applications sampled, the vast majorities did not provide  
12 information about references, full disclosure of sponsorship and whether the application has been  
13 modified in the last month. Xiao Q et al. [15] have also reported similar findings.  
14  
15  
16

17  
18 Based on the current review, it is obvious that most of the applications are lacking in several aspects and  
19 hence the resultant low scores on the Silberg scale. It is of importance that smartphone applications not  
20 only contain appropriate information, but smartphone applications do need to have appropriate  
21 references as well as cite the authors responsible for the creation of the informational contents. This is  
22 especially important for postnatal related applications, as these applications do frequent provide  
23 information not only for the new mothers, but also information relating to the care of their newborn  
24 babies. Zhang et al. [13] have previously proposed and highlighted the importance of having healthcare  
25 professionals in the joint conceptualization of smartphone applications, as well as having a  
26 governmental regulatory body to help in the assessment of applications which are deemed safe and  
27 reliable for the public to utilize. From our knowledge, the Royal College of Psychiatrists is one of the  
28 organization that has provided the public with mental health leaflets (both in print and online version)  
29 that is carefully curated in terms of information quality. The College have been successful in doing so, by  
30 ensuring that there is a group of experts to draft as well as to provide periodic timely updates to the  
31 mental health leaflets, to ensure that the information is kept current, as well as accurate. This strategy is  
32 perhaps how the college has been granted the United Kingdom's information safety standards for the  
33 information they have included in their leaflets for dissemination to the public.  
34  
35  
36  
37

38 Zhang et al. [14] in their previous analysis of the information quality of bariatric related applications  
39 have highlighted several reasons for the lack of provision of references for the information sources. The  
40 authors previously pointed out how variations in screen size might results in technical difficulties with  
41 the integration of reference sources. However, with the recent advances in smartphone application  
42 development, especially with the usage of cross-platform programming techniques, this issue could  
43 potentially be overcome, as the newer programming techniques would ensure the compatibility of the  
44 application across a myriad of varying devices as well as screen sizes. In addition, one of the reasons as  
45 to why most of the applications have not been updated recently nor indicated a date of last update has  
46 to do much with the way the applications have been developed. Most of the current conceptualizations  
47 relies heavily on coding informational content within the application, and hence updating the contents  
48 within the application would be an issue. In the conceptualization of further applications, it would be  
49 recommended for application developers and healthcare professionals to jointly consider the  
50 integration of a dynamic content management system, such that the information contents within the  
51 application could be updated in real-time and kept current.  
52  
53  
54  
55

56 In our current study, we have managed to identify some of the core functionalities of postnatal  
57 applications. Most of the identified applications are limited to the provision of pregnancy related  
58  
59  
60

1  
2  
3 information and psycho-educational information to new mothers. Several of these applications provide  
4 validated screening tools for the assessment of postnatal depressive symptoms. To our knowledge,  
5 there has only been one application that has included a cognitive behavioral therapy component as an  
6 intervention. From a clinical perspective, it would be helpful if there are more applications that have  
7 included a therapeutic component within the application.  
8  
9

10 One of the major strengths of the current study is that we managed to make use of a validated scale  
11 evaluate the information quality of postnatal depression applications that are currently available on the  
12 app stores. The usage of the scale has enabled us to determine the limitations in the information  
13 quality. In addition, as the same scale has also been utilized in the evaluation of other applications from  
14 other disciplines, we are able to compare and elucidate the common issues underlying the gaps in  
15 information quality across a spectrum of applications. The findings would be of relevance to regulatory  
16 bodies who are planning for policies involving smartphone applications. Despite the strengths, there are  
17 several limitations of the current study. In our current study, the applications are identified via either  
18 the Apple or the Android application stores. Whilst these are the two most common application stores,  
19 there might be very different applications available on the other platforms which we have not  
20 evaluated. In addition, we have limited the search strategy to applications that are in English language.  
21 We do acknowledge that there are multiple applications in other languages such as Spanish. Whilst the  
22 authors have extracted the applications from the store over a duration of one month, with the rapid  
23 development of smartphone applications using new technologies of cross-platform programming, it is  
24 not unexpected that new applications deployed onto the store after the period of evaluation are not  
25 considered. The Silberg scale might have well been validated across several studies for the evaluation of  
26 the information quality, but it is not specific for information quality for smartphone applications and  
27 does not cover and assess for other aspects of the smartphone application, such as usability and levels  
28 of engagement. More recently, researchers have proposed the utilization of the Mobile Application  
29 Rating Scale [17] for the evaluation of smartphone applications. Whilst the Mobile Application Rating  
30 Scale appears to be comprehensive, one of the concerns the authors have is that there are only 4  
31 questions looking into the information quality, which asked about only the quality, quantity, visual  
32 presentation and credibility of sources.  
33  
34  
35  
36  
37  
38

### 39 **Conclusions**

40  
41 Postnatal depression has an impact on the well-being of new mothers as well as their offspring, and  
42 hence it is clearly a disorder of importance, that warrants early screening and intervention. E-health  
43 have been demonstrated to be efficacious and there are M-health technologies deployed in low and  
44 middle income countries, that has been evaluated by research. However, there remains a myriad of  
45 postnatal applications on the application store. It is pertinent for us to determine not only the contents  
46 within these applications, as well as apply validated scales to assess their information quality. Like the  
47 bariatric and cardiovascular applications, there remains paucity of disclosures in various domains.  
48 Further conceptualizations and research on postnatal M-health technologies should target these areas  
49 identified in the current review.  
50  
51  
52

### 53 **Acknowledgements**

54  
55 The current study has received no funding support.  
56

### 57 **Disclosure statement:**

1  
2  
3 The authors declare that they have no competing interests.  
4

5 **Figure Legends:**  
6

7 Figure 1: Flow chart showing the selection process of smartphone applications related to postnatal care  
8  
9  
10  
11  
12  
13  
14  
15  
16  
17  
18  
19  
20  
21  
22  
23  
24  
25  
26  
27  
28  
29  
30  
31  
32

33 **References:**

- 34 1. Maternal Mental Health. World Health Organization. Extracted from  
35 [http://www.who.int/mental\\_health/maternal-child/maternal\\_mental\\_health/en/](http://www.who.int/mental_health/maternal-child/maternal_mental_health/en/), last assessed  
36 on 1<sup>st</sup> December 2016.
- 37 2. B.K. Puri, A. Hall and R. Ho (2014). Revision Notes in Psychiatry.  
38 London, UK: CRC Press, pp. 564-566
- 39 3. Nonnenmacher N, Noe D, Ehrental JC, Reck C. Postpartum bonding: the impact of  
40 maternal depression and adult attachment style. Arch Womens Ment Health. 2016  
41 Oct;19(5):927-35. doi: 10.1007/s00737-016-0648-y.
- 42 4. Liu Y, Kaaya S, Chai J, McCoy DC, Surkan PJ, Black MM, Sutter-Dallay AL, Verdoux H, & Smith-  
43 Fawzi MC (2017). Maternal depressive symptoms and early childhood cognitive development: a meta-  
44 analysis. Psychol Med.,47(4):680-689. doi: 10.1017/S003329171600283X
- 45 5. Korhonen, M., Luoma I., Salmelin, R., & Tamminem, T. (2012). A logitudinal study of maternal  
46 prenatal, postnatal and concurrent depressive symptoms and adolescent well-being. Journal of  
47 Affective Disorders, 136, 680-692.
- 48 6. Bauer A, Pawlby S, Plant DT, King D, Pariante CM, Knapp M. Perinatal depression and child  
49 development: exploring the economic consequences from a South London cohort. Psychol Med.  
50 2015 Jan;45(1):51-61. doi: 10.1017/S0033291714001044.
- 51 7. Postnatal depression guideline. National Institute for Clinical Excellence. Extracted from  
52 <https://www.nice.org.uk/guidance/cg192/chapter/1-Recommendations>, last assessed on 22<sup>nd</sup>  
53 November 2016  
54  
55  
56  
57  
58  
59  
60

- 1
  - 2
  - 3
  - 4
  - 5
  - 6
  - 7
  - 8
  - 9
  - 10
  - 11
  - 12
  - 13
  - 14
  - 15
  - 16
  - 17
  - 18
  - 19
  - 20
  - 21
  - 22
  - 23
  - 24
  - 25
  - 26
  - 27
  - 28
  - 29
  - 30
  - 31
  - 32
  - 33
  - 34
  - 35
  - 36
  - 37
  - 38
  - 39
  - 40
  - 41
  - 42
  - 43
  - 44
  - 45
  - 46
  - 47
  - 48
  - 49
  - 50
  - 51
  - 52
  - 53
  - 54
  - 55
  - 56
  - 57
  - 58
  - 59
  - 60
8. Youash S, Campbell MK, Avison W, Penava D, Sharma V, Xie B. [Influence of health information levels on postpartum depression](#). Arch Womens Ment Health. 2013 Dec;16(6):489-98. doi: 10.1007/s00737-013-0368-5. Epub 2013 Jul 3.
9. Farr SL, Denk CE, Dahms EW, Dietz PM. [Evaluating universal education and screening for postpartum depression using population-based data](#). J Womens Health (Larchmt). 2014 Aug;23(8):657-63. doi: 10.1089/jwh.2013.4586. Epub 2014 Jul 29.
10. Osma J, Barrera AZ, Ramphos E. Are Pregnant and Postpartum Women Interested in Health-Related Apps? Implications for the Prevention of Perinatal Depression. Cyberpsychol Behav Soc Netw. 2016 Jun;19(6):412-5. doi: 10.1089/cyber.2015.0549.
11. Lee EW, Denison FC, Hor K, Reynolds RM. Web-based interventions for prevention and treatment of perinatal mood disorders: a systematic review. BMC Pregnancy Childbirth. 2016 Feb 29;16:38. doi: 10.1186/s12884-016-0831-1.
12. Amoakoh-Coleman M, Borgstein AB, Sondaal SF, Grobbee DE, Miltenburg AS, Verwijs M, Ansa EK, Browne JL, Klipstein-Grobusch K. Effectiveness of mHealth Interventions Targeting Health Care Workers to Improve Pregnancy Outcomes in Low- and Middle-Income Countries: A Systematic Review. J Med Internet Res. 2016 Aug 19;18(8):e226. doi: 10.2196/jmir.5533.
13. Zhang MW, Ho RC, Cheok CCS. Technological Innovations in mental healthcare: Harnessing the digital revolution. Br J Psychiatry 2-15;206:263-265.
14. Zhang MW, Ho RC, Hawa R, Sockalingam S. Analysis of the Information Quality of Bariatric Surgery Smartphone Applications Using the Silberg Scale. Obes Surg. 2016 Jan;26(1):163-8. doi: 10.1007/s11695-015-1890-5. Review.
15. Xiao Q, Lu S, Wang Y, Sun L, Wu Y. Current Status of Cardiovascular Disease-Related Smartphone Apps Downloadable in China. Telemed J E Health. 2016 Jun 29. [Epub ahead of print]
16. Griffiths KM, Christensen H. Quality of Web-based information on the treatment of depression: a cross-section survey. BMJ. 2000;321(7275):1511-5.
17. Domnich A, Arata L, Amicizia D, Signori A, Patrick B, Stoyanov S, Hides L, Gasparini R, Panatto D. Development and validation of the Italian version of the Mobile Application Rating Scale and its generalisability to apps targeting primary prevention. BMC Med Inform Decis Mak. 2016 Jul 7;16:83. doi: 10.1186/s12911-016-0323-2.

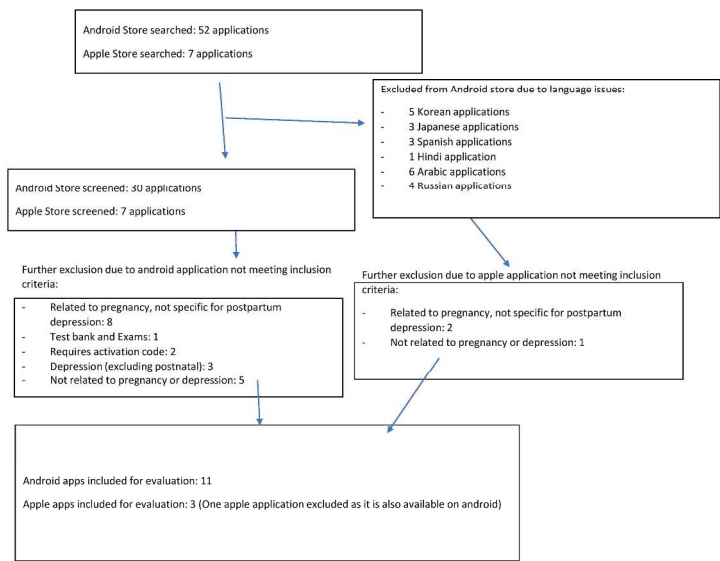

Figure 1: Flowchart of the selection of smartphone applications

338x190mm (300 x 300 DPI)

review only

1  
2  
3  
4  
5  
6  
7  
8  
9  
10  
11  
12  
13  
14  
15  
16  
17  
18  
19  
20  
21  
22  
23  
24  
25  
26  
27  
28  
29  
30  
31  
32  
33  
34  
35  
36  
37  
38  
39  
40  
41  
42  
43  
44  
45  
46  
47  
48  
49  
50  
51  
52  
53  
54  
55  
56  
57  
58  
59  
60
